# Supplementary material for: TGF-alpha/EGFR signalling mediates retinoic acid-induced lung repair
Source: Research Square preprint supplement (doi:10.21203/rs.3.rs-7704784/v1), 2025-11-24
Supplement: Supplementary file 1 [file c520c920f90d492148c74bf6.xlsx]

## Sheet: Table S1
Table S1. List of DEGs at 40 minutes post-treatment comparing EtOH control and RA-treated HPMECs.
ID	Gene Symbol	Description	RA_40 min Avg (log2)	Untreated_40 min Avg (log2)	Fold Change	P-val
1565131_x_at	MAP3K2	mitogen-activated protein kinase kinase kinase 2	5.27	2.26	8.04	6.31e-07
239801_at	RNF40	ring finger protein 40, E3 ubiquitin protein ligase	3.28	6.32	-8.21	6.15e-06
233820_at	FAS	Fas cell surface death receptor	1.98	4.63	-6.3	2.52e-05
241209_at	DCAF6	DDB1 and CUL4 associated factor 6	4.85	1.18	12.66	3.25e-05
230737_s_at	SVIL-AS1	SVIL antisense RNA 1	5.87	8.88	-8.09	3.55e-05
209821_at	IL33	interleukin 33	0	4.73	-26.57	4.01e-05
231138_at	TRPC5OS	TRPC5 opposite strand	1.84	5.2	-10.27	4.27e-05
228820_at	XPNPEP3	X-prolyl aminopeptidase 3, mitochondrial	7.11	1.83	38.97	4.5e-05
243622_at	LOC145694	uncharacterized LOC145694	4.43	6.2	-3.42	5.77e-05
238395_at	LOC105375089	uncharacterized LOC105375089	7	3.95	8.27	6.33e-05
227982_at	SEPSECS	Sep (O-phosphoserine) tRNA:Sec (selenocysteine) tRNA synthase	1.45	6.24	-27.58	8.69e-05
1562836_at	DDX6	DEAD (Asp-Glu-Ala-Asp) box helicase 6	8.91	10.61	-3.26	0.0001
226281_at	DNER	delta/notch like EGF repeat containing	3.99	6.1	-4.32	0.0001
227521_at	FBXO33	F-box protein 33	9.53	7.14	5.25	0.0001
1555568_at	GUSBP2	glucuronidase, beta pseudogene 2	6.72	3.48	9.41	0.0001
244255_at	LOC286114	uncharacterized LOC286114	4.76	1.67	8.5	0.0001
211280_s_at	NRF1	nuclear respiratory factor 1	6.21	8.05	-3.59	0.0001
212002_at	SZRD1	SUZ RNA binding domain containing 1	7.48	9.79	-4.98	0.0001
237179_at	PCMTD2	protein-L-isoaspartate (D-aspartate) O-methyltransferase domain containing 2	3.35	5.49	-4.39	0.0002
215253_s_at	RCAN1	regulator of calcineurin 1	5.8	7.83	-4.09	0.0002
219699_at	LGI2	leucine-rich repeat LGI family, member 2	3.91	2.24	3.19	0.0002
202323_s_at	ACBD3	acyl-CoA binding domain containing 3	7.99	9.44	-2.72	0.0002
229295_at	IL17RA	interleukin 17 receptor A	3.38	8.3	-30.44	0.0002
210482_x_at	MAP2K5	mitogen-activated protein kinase kinase 5	7.59	9.89	-4.96	0.0002
1561558_at	PRKG1-AS1	PRKG1 antisense RNA 1	0.94	4.08	-8.78	0.0003
224392_s_at	OPN3	opsin 3	7.96	9.29	-2.5	0.0003
1562261_at	AMZ1	archaelysin family metallopeptidase 1	6.26	1.91	20.28	0.0004
223496_s_at	CCDC8	coiled-coil domain containing 8	2.04	4.86	-7.04	0.0004
228198_s_at	FAHD2CP	fumarylacetoacetate hydrolase domain containing 2C, pseudogene	4.97	7.43	-5.52	0.0004
207174_at	GPC5	glypican 5	5.08	6.72	-3.11	0.0004
235458_at	HAVCR2	hepatitis A virus cellular receptor 2	6.28	8.33	-4.14	0.0004
205697_at	SCGN	secretagogin, EF-hand calcium binding protein	5.56	2.9	6.32	0.0004
226181_at	TUBE1	tubulin, epsilon 1	5.25	7.5	-4.73	0.0005
230643_at	WNT9A	wingless-type MMTV integration site family, member 9A	5.93	7.52	-3.02	0.0005
243690_at	TRIOBP	TRIO and F-actin binding protein	6.78	9.85	-8.42	0.0005
215800_at	DUOX1	dual oxidase 1	3.91	6.02	-4.31	0.0005
219208_at	FBXO11	F-box protein 11	6.26	8.27	-4.02	0.0005
225259_at	RAB6B	RAB6B, member RAS oncogene family	3.09	6.52	-10.78	0.0005
222333_at	ALS2CL	ALS2 C-terminal like	4.38	7.68	-9.81	0.0005
231228_at	BCL2L1	BCL2-like 1	3.64	6.8	-8.9	0.0006
240433_x_at	CADM2	cell adhesion molecule 2	0.1	3.9	-13.88	0.0006
225254_at	CCDC97	coiled-coil domain containing 97	6.75	9.45	-6.51	0.0006
220860_at	PURG	purine-rich element binding protein G	2.99	5.89	-7.44	0.0006
225796_at	PXK	PX domain containing serine/threonine kinase	6.6	8.24	-3.12	0.0006
230440_at	ZNF469	zinc finger protein 469	6.12	8.1	-3.94	0.0006
214438_at	HLX	H2.0-like homeobox	6.77	8.76	-3.96	0.0007
235150_at	SESN3	sestrin 3	3.4	6.84	-10.81	0.0007
240806_at	RPL15	ribosomal protein L15	8.52	5.69	7.14	0.0007
241398_at	MPPED1	metallophosphoesterase domain containing 1	3	5.63	-6.22	0.0007
233109_at	COL12A1	collagen, type XII, alpha 1	4.69	0.76	15.26	0.0008
210114_at	INVS	inversin	6.84	8.84	-3.98	0.0008
235971_at	TIFA	TRAF-interacting protein with forkhead-associated domain	5.18	7.95	-6.82	0.0008
210995_s_at	TRIM23	tripartite motif containing 23	6.08	8.18	-4.28	0.0009
1555932_at	TSGA10	testis specific 10	0.58	4.42	-14.27	0.0009
230566_at	MORC2-AS1	MORC2 antisense RNA 1	4.69	7.88	-9.09	0.0009
1553139_s_at	PLXNA3	plexin A3	5.73	7.42	-3.24	0.0009
206629_at	ADAMTSL2	ADAMTS like 2	3.45	1.94	2.85	0.0009
213785_at	IPO9	importin 9	4.65	7.81	-8.92	0.0009
222759_at	KMT5B	lysine (K)-specific methyltransferase 5B	5.61	8.73	-8.72	0.0009
230174_at	LYPLAL1	lysophospholipase-like 1	3.64	7.25	-12.22	0.0009
235259_at	PACRGL	PARK2 co-regulated like	6.95	8.43	-2.79	0.0009
226305_at	LYNX1	Ly6/neurotoxin 1	5.5	8.16	-6.32	0.001
222569_at	UGGT1	UDP-glucose glycoprotein glucosyltransferase 1	9.41	10.62	-2.31	0.001
229324_x_at	ISYNA1	inositol-3-phosphate synthase 1	5.64	7.42	-3.43	0.0011
1559655_at	MAMDC2-AS1	MAMDC2 antisense RNA 1	0.64	4.24	-12.09	0.0011
236813_at	MORN4	MORN repeat containing 4	5.74	8.54	-6.96	0.0011
228322_at	NAA30	N(alpha)-acetyltransferase 30, NatC catalytic subunit	10.83	8.84	3.97	0.0011
235062_at	PIH1D2	PIH1 domain containing 2	3.1	5.37	-4.81	0.0011
215901_at	ZNF81	zinc finger protein 81	1.63	5.7	-16.76	0.0011
1554808_at	ACP1	acid phosphatase 1, soluble	1.43	5.27	-14.31	0.0012
221132_at	CLDN18	claudin 18	2.12	5.18	-8.3	0.0012
1569849_at	LOC102723831	uncharacterized LOC102723831	5.45	2.62	7.12	0.0012
226591_at	PWAR6	Prader Willi/Angelman region RNA 6	5.71	3.18	5.76	0.0012
235815_at	TSHZ2	teashirt zinc finger homeobox 2	3.94	1.75	4.56	0.0012
222195_s_at	TRMO	tRNA methyltransferase O	6.93	8.13	-2.31	0.0013
242208_at	ZNF37BP	zinc finger protein 37B, pseudogene	2.91	7.75	-28.78	0.0013
228207_at	LOC100499489	uncharacterized LOC100499489	4.58	8.61	-16.38	0.0014
1569375_at	LOC101929964	uncharacterized LOC101929964	2.63	5.2	-5.94	0.0014
235431_s_at	PELI3	pellino E3 ubiquitin protein ligase family member 3	7.25	8.66	-2.65	0.0014
1552625_a_at	TRNT1	tRNA nucleotidyl transferase, CCA-adding, 1	8.4	9.5	-2.15	0.0014
212892_at	ZNF282	zinc finger protein 282	7.26	8.44	-2.27	0.0014
241389_at	CHRNB2	cholinergic receptor, nicotinic beta 2	4.59	6.57	-3.94	0.0015
1556873_at	MEX3C	mex-3 RNA binding family member C	1.24	4.62	-10.4	0.0015
226428_at	TNPO2	transportin 2	8.72	9.99	-2.41	0.0015
203864_s_at	ACTN2	actinin, alpha 2	2.24	4.74	-5.65	0.0015
235030_at	NXPE3	neurexophilin and PC-esterase domain family, member 3	6.84	8.3	-2.77	0.0015
214525_x_at	MLH3	mutL homolog 3	5.53	8.06	-5.79	0.0016
218183_at	CDIP1	cell death-inducing p53 target 1	6.05	8.36	-4.96	0.0016
219440_at	RAI2	retinoic acid induced 2	1.67	7.23	-47.12	0.0016
220211_at	FLJ13224	uncharacterized LOC79857	2.14	5.59	-10.96	0.0016
1568999_at	PSG4; PSG6	pregnancy specific beta-1-glycoprotein 4; pregnancy specific beta-1-glycoprotein 6	8.49	6.43	4.19	0.0016
210994_x_at	TRIM23	tripartite motif containing 23	4.85	7.97	-8.72	0.0017
1554345_a_at	GIN1	gypsy retrotransposon integrase 1	4.74	6.61	-3.64	0.0017
202083_s_at	SEC14L1	SEC14-like lipid binding 1	9.66	10.73	-2.09	0.0017
211896_s_at	DCN	decorin	6.31	4.01	4.92	0.0018
216902_s_at	RRN3; RRN3P1; RRN3P2	RRN3 homolog, RNA polymerase I transcription factor; RRN3 homolog, RNA polymerase I transcription factor pseudogene 1; RRN3 homolog, RNA polymerase I transcription factor pseudogene 2	7.91	9.45	-2.9	0.0018
223333_s_at	ANGPTL4	angiopoietin like 4	9.43	7.4	4.09	0.0019
1554312_at	RNF170	ring finger protein 170	4.57	5.58	-2.01	0.0019
207350_s_at	VAMP4	vesicle associated membrane protein 4	8.38	9.72	-2.53	0.0019
235661_at	POU2F2	POU class 2 homeobox 2	7.28	8.61	-2.52	0.0019
229598_at	COBLL1	cordon-bleu WH2 repeat protein like 1	1.59	5.89	-19.74	0.002
206821_x_at	AGFG2	ArfGAP with FG repeats 2	7.43	9.05	-3.07	0.002
228930_at	SNHG21	small nucleolar RNA host gene 21	6.06	8.59	-5.77	0.002
215099_s_at	RXRB	retinoid X receptor beta	9.36	10.64	-2.43	0.0021
230750_at	BAG2	BCL2-associated athanogene 2	8.39	9.8	-2.66	0.0021
210157_at	URI1	URI1, prefoldin-like chaperone	3.92	7.21	-9.75	0.0022
236641_at	KIF14	kinesin family member 14	6.27	9.31	-8.26	0.0022
219304_s_at	PDGFD	platelet derived growth factor D	5.15	7.46	-4.94	0.0022
1559298_a_at	SPATA41	spermatogenesis associated 41 (non-protein coding)	1.6	3.98	-5.21	0.0022
1554053_at	SPTLC1	serine palmitoyltransferase, long chain base subunit 1	4.92	7.84	-7.56	0.0022
211527_x_at	VEGFA	vascular endothelial growth factor A	9.33	7.97	2.57	0.0023
231242_at	BHLHE41	basic helix-loop-helix family, member e41	4.48	2.15	5.05	0.0023
1569677_a_at	MCMDC2	minichromosome maintenance domain containing 2	4.84	1.24	12.06	0.0023
226841_at	MPEG1	macrophage expressed 1	2.85	5.11	-4.77	0.0024
209105_at	NCOA1	nuclear receptor coactivator 1	6.71	9.37	-6.29	0.0024
204128_s_at	RFC3	replication factor C subunit 3	7.55	8.43	-1.85	0.0024
211591_s_at	PDE4A	phosphodiesterase 4A, cAMP-specific	7.14	8.77	-3.1	0.0024
244767_at	FRA10AC1	fragile site, folic acid type, rare, fra(10)(q23.3) or fra(10)(q24.2) candidate 1	2.66	4.95	-4.88	0.0025
241682_at	KLHL23	kelch-like family member 23	6.4	8.08	-3.21	0.0025
1558281_a_at	TMEM184A	transmembrane protein 184A	5.84	2.93	7.57	0.0025
234367_x_at	TMPRSS6	transmembrane protease, serine 6	5.74	2.56	9.05	0.0025
243444_at	SRD5A3	steroid 5 alpha-reductase 3	6.79	8.27	-2.8	0.0026
227941_at	LOC339803	uncharacterized LOC339803	8.97	8.28	1.61	0.0026
228590_at	PTCD3	pentatricopeptide repeat domain 3	2.19	6.99	-27.83	0.0027
226728_at	SLC27A1	solute carrier family 27 (fatty acid transporter), member 1	6.61	7.74	-2.19	0.0027
219404_at	EPS8L3	EPS8-like 3	2.5	4.7	-4.58	0.0027
206599_at	SLC16A5	solute carrier family 16 (monocarboxylate transporter), member 5	5.53	7.12	-3	0.0028
207338_s_at	ZNF200	zinc finger protein 200	5.5	6.98	-2.81	0.0028
207275_s_at	ACSL1	acyl-CoA synthetase long-chain family member 1	6.12	7.7	-2.99	0.0029
228247_at	LOC283788	FSHD region gene 1 pseudogene	4.08	7.99	-15.08	0.0029
218273_s_at	PDP1	pyruvate dehyrogenase phosphatase catalytic subunit 1	8.89	9.96	-2.1	0.0029
232142_at	ISY1	ISY1 splicing factor homolog	2.73	6	-9.63	0.003
203806_s_at	FANCA	Fanconi anemia complementation group A	6.02	8.06	-4.1	0.0031
222916_s_at	HDLBP	high density lipoprotein binding protein	5.89	7.34	-2.74	0.0031
233988_x_at	SCUBE1	signal peptide, CUB domain, EGF-like 1	5.06	3.36	3.24	0.0031
211367_s_at	CASP1	caspase 1	3.56	6.58	-8.1	0.0032
231111_at	SCYL3	SCY1-like, kinase-like 3	3.49	0.23	9.61	0.0032
228057_at	DDIT4L	DNA-damage-inducible transcript 4-like	3.62	5.82	-4.62	0.0032
204250_s_at	CEP164	centrosomal protein 164kDa	5.24	7.78	-5.8	0.0033
208902_s_at	RPS28	ribosomal protein S28	10.6	9.7	1.88	0.0033
210793_s_at	NUP98	nucleoporin 98kDa	4.18	8.62	-21.8	0.0033
230589_at	TRAF3IP2-AS1	TRAF3IP2 antisense RNA 1	4.59	6.8	-4.63	0.0033
244293_at	UQCRB	ubiquinol-cytochrome c reductase binding protein	4.82	7.12	-4.93	0.0035
227180_at	ELOVL7	ELOVL fatty acid elongase 7	3.63	0.11	11.43	0.0035
234935_at	NDOR1	NADPH dependent diflavin oxidoreductase 1	6.7	7.61	-1.88	0.0036
1553319_at	OXGR1	oxoglutarate (alpha-ketoglutarate) receptor 1	2	4.36	-5.11	0.0036
203674_at	HELZ	helicase with zinc finger	2.39	7.3	-30.01	0.0036
230305_at	DNAJC15	DnaJ (Hsp40) homolog, subfamily C, member 15	4.33	7.17	-7.17	0.0037
203551_s_at	COX11	COX11 cytochrome c oxidase copper chaperone	2.93	7.23	-19.79	0.0037
229493_at	HOXD-AS2	HOXD cluster antisense RNA 2	5.89	8.72	-7.11	0.0037
228758_at	BCL6	B-cell CLL/lymphoma 6	8.26	6.27	3.95	0.0037
232423_at	ARSD	arylsulfatase D	2.77	5.36	-6.01	0.0038
215329_s_at	CDK11A; CDK11B	cyclin-dependent kinase 11A; cyclin-dependent kinase 11B	8.1	9.94	-3.58	0.0038
233162_at	LOC101926892	uncharacterized LOC101926892	3.89	0.51	10.39	0.0041
203162_s_at	KATNB1	katanin p80 (WD repeat containing) subunit B 1	9.72	8.85	1.83	0.0042
220723_s_at	CWH43	cell wall biogenesis 43 C-terminal homolog	4.32	1.67	6.27	0.0042
223378_at	GLIS2	GLIS family zinc finger 2	7.91	9.26	-2.54	0.0042
228855_at	NUDT7	nudix hydrolase 7	4.42	8.03	-12.17	0.0043
228645_at	SNHG9	small nucleolar RNA host gene 9	5.23	7.03	-3.48	0.0044
244882_at	TNRC18	trinucleotide repeat containing 18	2.77	5.15	-5.23	0.0044
215437_x_at	BAZ2A	bromodomain adjacent to zinc finger domain 2A	5.14	6.42	-2.44	0.0044
1555804_a_at	MAP3K19	mitogen-activated protein kinase kinase kinase 19	1.07	5.12	-16.52	0.0045
232071_at	MRPL19	mitochondrial ribosomal protein L19	1.62	5.9	-19.48	0.0045
228789_at	MTMR6	myotubularin related protein 6	5.41	8.62	-9.21	0.0045
222689_at	ACER3	alkaline ceramidase 3	7.68	9.2	-2.86	0.0046
219785_s_at	C16orf95	chromosome 16 open reading frame 95	4.89	9.09	-18.44	0.0047
230178_s_at	ELP2	elongator acetyltransferase complex subunit 2	8.01	9.99	-3.95	0.0047
204510_at	CDC7	cell division cycle 7	5.34	8.29	-7.7	0.0048
1558699_a_at	HERPUD2	HERPUD family member 2	8.96	10.13	-2.24	0.0048
233889_at	TBX18	T-box 18	6.5	8.16	-3.15	0.0049
220105_at	RSPH14	radial spoke head 14 homolog (Chlamydomonas)	2.11	6.19	-16.91	0.005
1552318_at	GIMAP1	GTPase, IMAP family member 1	8.09	9.89	-3.48	0.0051
216392_s_at	SEC23IP	SEC23 interacting protein	9.2	9.82	-1.54	0.0051
203340_s_at	SLC25A12	solute carrier family 25 (aspartate/glutamate carrier), member 12	4.55	7.97	-10.69	0.0051
219807_x_at	MIA-RAB4B; RAB4B	MIA-RAB4B readthrough (NMD candidate); RAB4B, member RAS oncogene family	9.71	8.84	1.83	0.0051
222908_at	PIEZO2	piezo-type mechanosensitive ion channel component 2	6.84	8.39	-2.92	0.0051
244105_at	WHAMMP2; WHAMMP3	WAS protein homolog associated with actin, golgi membranes and microtubules pseudogene 2; WAS protein homolog associated with actin, golgi membranes and microtubules pseudogene 3	7.12	8.81	-3.22	0.0052
226234_at	GDF11	growth differentiation factor 11	9.39	10.12	-1.66	0.0052
210822_at	RPL13P5	ribosomal protein L13 pseudogene 5	6.95	4.57	5.2	0.0052
221519_at	FBXW4	F-box and WD repeat domain containing 4	8.23	9.61	-2.61	0.0053
242594_at	BOD1L1	biorientation of chromosomes in cell division 1-like 1	5.55	6.32	-1.71	0.0053
238792_at	PCNX	pecanex homolog (Drosophila)	4.67	7.09	-5.35	0.0053
203988_s_at	FUT8	fucosyltransferase 8 (alpha (1,6) fucosyltransferase)	8.91	10.29	-2.61	0.0054
239812_s_at	IQCH	IQ motif containing H	3.18	6.06	-7.4	0.0054
228291_s_at	KIZ	kizuna centrosomal protein	7.93	9.9	-3.93	0.0054
1556899_at	PRMT5-AS1	PRMT5 antisense RNA 1	5.39	6.68	-2.45	0.0054
229313_at	ANO5	anoctamin 5	1.27	4.44	-9.01	0.0055
217087_at	C1orf68	chromosome 1 open reading frame 68	3.53	6.05	-5.74	0.0055
208838_at	CAND1	cullin-associated and neddylation-dissociated 1	7.05	9.01	-3.89	0.0055
227933_at	LINGO1	leucine rich repeat and Ig domain containing 1	5.71	7.59	-3.67	0.0055
227325_at	INAFM1	InaF-motif containing 1	8.36	7.59	1.7	0.0056
236288_at	RNF34	ring finger protein 34, E3 ubiquitin protein ligase	4.35	8.12	-13.64	0.0056
1562490_at	THEM5	thioesterase superfamily member 5	3.7	5.26	-2.94	0.0056
1559403_at	HMGN3-AS1	HMGN3 antisense RNA 1	0.68	4.64	-15.57	0.0056
221615_at	BMP8B	bone morphogenetic protein 8b	7.38	8.92	-2.91	0.0057
1566558_x_at	BAIAP2-AS1	BAIAP2 antisense RNA 1 (head to head)	6.69	8.1	-2.66	0.0058
242989_at	STRN	striatin, calmodulin binding protein	4.97	6.67	-3.24	0.0058
237732_at	PRR9	proline rich 9	3.9	5.12	-2.32	0.0059
231958_at	TAMM41	TAM41 mitochondrial translocator assembly and maintenance homolog	5.12	1.46	12.6	0.0059
1557866_at	CFAP157	cilia and flagella associated protein 157	5.05	8.47	-10.7	0.006
206708_at	FOXN2	forkhead box N2	8.2	9.22	-2.03	0.006
226925_at	PXYLP1	2-phosphoxylose phosphatase 1	7.41	8.77	-2.56	0.006
227615_at	SRRD	SRR1 domain containing	9.14	10.51	-2.59	0.006
243661_at	ZNF273	zinc finger protein 273	2.81	6.41	-12.14	0.006
222871_at	KLHDC8A	kelch domain containing 8A	0.97	3.73	-6.76	0.0061
1554316_at	PGLS	6-phosphogluconolactonase	5	7.1	-4.3	0.0061
242488_at	CHRM3	cholinergic receptor, muscarinic 3	1.48	4.76	-9.75	0.0061
223593_at	AADAT	aminoadipate aminotransferase	6.18	8.24	-4.17	0.0063
214325_at	GP2	glycoprotein 2 (zymogen granule membrane)	3.46	1.6	3.62	0.0063
219584_at	PLA1A	phospholipase A1 member A	8.03	5.74	4.9	0.0063
227822_at	ZNF605	zinc finger protein 605	2.92	6.69	-13.62	0.0063
231813_s_at	COG1	component of oligomeric golgi complex 1	7.5	8.34	-1.79	0.0064
213040_s_at	NPTXR	neuronal pentraxin receptor	5.32	1.62	13.04	0.0064
1554122_a_at	HSD17B12	hydroxysteroid (17-beta) dehydrogenase 12	2.25	6.05	-13.94	0.0065
238213_at	MIR5188	microRNA 5188	4.34	2.28	4.18	0.0065
219069_at	ANKRD49	ankyrin repeat domain 49	3.65	7.08	-10.84	0.0067
224071_at	IL20	interleukin 20	4.28	1.56	6.58	0.0068
1565544_at	RNF141	ring finger protein 141	4.43	2.18	4.78	0.0068
238458_at	MICU3	mitochondrial calcium uptake family, member 3	2.05	5.03	-7.92	0.0069
226604_at	TMTC3	transmembrane and tetratricopeptide repeat containing 3	4.2	8.47	-19.29	0.0069
242207_at	CENPP; LOC100128361	centromere protein P; uncharacterized LOC100128361	7.83	4.78	8.26	0.007
1552390_a_at	ERICH5	glutamate rich 5	0.67	3.5	-7.11	0.007
223837_at	GULP1	GULP, engulfment adaptor PTB domain containing 1	0.9	5	-17.15	0.007
231036_at	LOC100505774	uncharacterized LOC100505774	1.25	4.81	-11.86	0.007
1568892_at	LOC100996251	uncharacterized LOC100996251	0.39	3.46	-8.41	0.007
1562689_at	LOC151484	uncharacterized LOC151484	3.72	5.66	-3.83	0.007
242009_at	SLC6A4	solute carrier family 6 (neurotransmitter transporter), member 4	3.8	6.54	-6.68	0.007
220443_s_at	VAX2	ventral anterior homeobox 2	2.13	4.45	-4.99	0.007
1555111_at	CCDC181	coiled-coil domain containing 181	2.24	0	4.73	0.0071
230837_at	LOC100132057	phosphodiesterase 4D interacting protein pseudogene	1.99	4.71	-6.61	0.0072
235413_at	GGCX	gamma-glutamyl carboxylase	7.57	9.01	-2.71	0.0073
222292_at	CD40	CD40 molecule, TNF receptor superfamily member 5	6.65	2.16	22.41	0.0073
206787_at	BRDT	bromodomain, testis-specific	1.94	5.31	-10.36	0.0073
226900_at	GABPB1-AS1	GABPB1 antisense RNA 1	10.56	8.34	4.67	0.0073
1556588_at	ST20-AS1	ST20 antisense RNA 1	6.25	8.3	-4.15	0.0073
219339_s_at	EHMT1	euchromatic histone-lysine N-methyltransferase 1	6.48	7.46	-1.97	0.0074
219378_at	NAA16	N(alpha)-acetyltransferase 16, NatA auxiliary subunit	7.18	8.4	-2.33	0.0074
224905_at	WDR26	WD repeat domain 26	9.13	10.32	-2.27	0.0074
209281_s_at	ATP2B1	ATPase, Ca++ transporting, plasma membrane 1	8.52	9.61	-2.12	0.0075
204680_s_at	RAPGEF5	Rap guanine nucleotide exchange factor 5	9.45	8.44	2	0.0075
211266_s_at	GPR4	G protein-coupled receptor 4	6.66	7.9	-2.36	0.0076
235845_at	SP5	Sp5 transcription factor	5.11	2.75	5.15	0.0076
1559566_at	FBXO42	F-box protein 42	2.26	4.62	-5.14	0.0076
230276_at	FAM49A	family with sequence similarity 49, member A	7.68	8.42	-1.67	0.0077
231786_at	HOXA13	homeobox A13	4.59	2.15	5.44	0.0079
235163_at	MOB3A	MOB kinase activator 3A	7.64	8.7	-2.09	0.0079
1555175_a_at	PBLD	phenazine biosynthesis-like protein domain containing	2.26	5.95	-12.87	0.0079
223655_at	CD163L1	CD163 molecule-like 1	4.89	7.67	-6.85	0.008
1570360_s_at	DDX3Y	DEAD (Asp-Glu-Ala-Asp) box helicase 3, Y-linked	3	5.41	-5.29	0.008
227118_s_at	MRPS26	mitochondrial ribosomal protein S26	9.46	7.99	2.77	0.008
213964_x_at	RPARP-AS1	RPARP antisense RNA 1	4.09	7.04	-7.75	0.008
1557014_a_at	FAM201A	family with sequence similarity 201, member A	1.19	4.86	-12.7	0.0081
240616_at	LOC105370333	uncharacterized LOC105370333	9.54	7.65	3.72	0.0081
215932_at	MAGEC2	MAGE family member C2	1.87	4.78	-7.5	0.0081
244118_at	GABRA1	gamma-aminobutyric acid (GABA) A receptor, alpha 1	4.73	1.81	7.57	0.0082
201733_at	CLCN3	chloride channel, voltage-sensitive 3	6.9	8.58	-3.21	0.0082
241957_x_at	LIN7B	lin-7 homolog B (C. elegans)	6.47	7.9	-2.69	0.0082
232088_x_at	LINC00899	long intergenic non-protein coding RNA 899	2.44	4.97	-5.76	0.0082
237351_at	LOC284825	uncharacterized LOC284825	0.71	3.25	-5.82	0.0083
207250_at	SIX6	SIX homeobox 6	2.66	5.16	-5.66	0.0083
219345_at	BOLA1	bolA family member 1	5.49	7.46	-3.91	0.0084
210513_s_at	VEGFA	vascular endothelial growth factor A	10.04	8.6	2.71	0.0084
1564039_at	ZSCAN23	zinc finger and SCAN domain containing 23	4.12	5.6	-2.8	0.0084
232686_at	SIGLEC17P	sialic acid binding Ig-like lectin 17, pseudogene	4.94	2.17	6.81	0.0085
229623_at	TMEM150C	transmembrane protein 150C	9.79	11.1	-2.48	0.0085
234455_at	ZFP1	ZFP1 zinc finger protein	0.4	5.71	-39.5	0.0085
232249_at	FMNL3	formin like 3	10.3	11.43	-2.19	0.0085
242956_at	IDH1	isocitrate dehydrogenase 1 (NADP+)	6.15	4.72	2.69	0.0085
221234_s_at	BACH2	BTB and CNC homology 1, basic leucine zipper transcription factor 2	5.36	6.49	-2.18	0.0086
204757_s_at	C2CD2L	C2CD2-like	8.7	7.21	2.8	0.0086
1553491_at	KSR2	kinase suppressor of ras 2	1.34	5.63	-19.56	0.0086
1563120_at	LOC100129029	uncharacterized LOC100129029	8.11	5.74	5.19	0.0086
214564_s_at	PCDHGC3	protocadherin gamma subfamily C, 3	6.94	7.97	-2.04	0.0086
236914_at	LOC100506790	uncharacterized LOC100506790	5.58	2.8	6.86	0.0086
204230_s_at	SLC17A7	solute carrier family 17 (vesicular glutamate transporter), member 7	6.03	4.71	2.5	0.0087
1560250_s_at	LOC284242	uncharacterized LOC284242	2.47	5.25	-6.9	0.0088
208334_at	NDST4	N-deacetylase/N-sulfotransferase (heparan glucosaminyl) 4	4.22	2.23	3.96	0.0088
1552803_a_at	STMN1	stathmin 1	4.79	5.47	-1.6	0.0088
217618_x_at	HUS1	HUS1 checkpoint clamp component	9.03	9.82	-1.73	0.0089
231421_at	LINC00710	long intergenic non-protein coding RNA 710	0.76	4.56	-13.98	0.0089
238180_at	LOC102724094	uncharacterized LOC102724094	4.44	6.74	-4.92	0.0089
219756_s_at	POF1B	premature ovarian failure, 1B	5.36	7.58	-4.67	0.0089
231689_at	TRPM7	transient receptor potential cation channel, subfamily M, member 7	7.59	8.68	-2.13	0.0089
207976_at	KLHL18	kelch-like family member 18	5.28	2.7	6	0.009
1559668_s_at	LOC105376323	uncharacterized LOC105376323	3.58	5.81	-4.69	0.009
233562_at	LINC00839	long intergenic non-protein coding RNA 839	5.55	7.38	-3.55	0.0091
228092_at	CREM	cAMP responsive element modulator	6.27	7.96	-3.23	0.0093
217669_s_at	AKAP6	A kinase (PRKA) anchor protein 6	4.22	2	4.67	0.0093
1569629_x_at	LOC101930105; LOC389906; LOC441528; LOC729162	zinc finger protein 839-like; zinc finger protein 839 pseudogene; uncharacterized LOC729162	7.08	8.06	-1.96	0.0094
233234_at	KCTD16	potassium channel tetramerization domain containing 16	1.54	5.47	-15.23	0.0094
238729_x_at	SAV1	salvador family WW domain containing protein 1	3.76	7.36	-12.06	0.0094
218295_s_at	NUP50	nucleoporin 50kDa	10.01	10.81	-1.75	0.0095
1553222_at	OXER1	oxoeicosanoid (OXE) receptor 1	5.15	3.08	4.21	0.0095
223598_at	RAD23B	RAD23 homolog B, nucleotide excision repair protein	9.29	10.44	-2.22	0.0095
233840_at	LOC100130950	uncharacterized LOC100130950	1.51	3.73	-4.68	0.0096
1552309_a_at	NEXN	nexilin (F actin binding protein)	6.03	7.88	-3.62	0.0096
227686_at	OXNAD1	oxidoreductase NAD-binding domain containing 1	7.74	9.1	-2.57	0.0096
223681_s_at	INADL	InaD-like (Drosophila)	0.57	5	-21.54	0.0097
1553341_at	UROC1	urocanate hydratase 1	2.48	4.36	-3.68	0.0098
209426_s_at	AMACR; C1QTNF3-AMACR	alpha-methylacyl-CoA racemase; C1QTNF3-AMACR readthrough (NMD candidate)	8.51	9.92	-2.66	0.0098
226199_at	UPRT	uracil phosphoribosyltransferase (FUR1) homolog (S. cerevisiae)	7.76	8.98	-2.33	0.0098
216615_s_at	HTR3A	5-hydroxytryptamine (serotonin) receptor 3A, ionotropic	1.85	3.69	-3.58	0.01
215698_at	KDM5A	lysine (K)-specific demethylase 5A	6.06	8.13	-4.21	0.01
1556885_at	LAYN	layilin	6.1	3.38	6.6	0.01
206530_at	RAB30	RAB30, member RAS oncogene family	6.9	8.88	-3.94	0.01
243026_x_at	XIAP	X-linked inhibitor of apoptosis, E3 ubiquitin protein ligase	6.41	7.4	-1.99	0.01
220909_at	TRIM46	tripartite motif containing 46	3.71	5.67	-3.88	0.0101
225569_at	AGO2	argonaute RISC catalytic component 2	8.6	10.17	-2.98	0.0101
1558871_at	LOC105377276	uncharacterized LOC105377276	2.33	4.47	-4.41	0.0101
223735_at	ARL6	ADP-ribosylation factor like GTPase 6	3.44	7.58	-17.68	0.0102
225956_at	CREBRF	CREB3 regulatory factor	7.32	9.05	-3.32	0.0102
32032_at	DGCR14	DiGeorge syndrome critical region gene 14	9.97	8.83	2.2	0.0102
215861_at	LOC101927770	uncharacterized LOC101927770	3.86	6.46	-6.07	0.0102
202855_s_at	SLC16A3	solute carrier family 16 (monocarboxylate transporter), member 3	4.68	7.11	-5.39	0.0103
203209_at	RFC5	replication factor C subunit 5	8.2	9.05	-1.81	0.0104
235014_at	ILF3-AS1	ILF3 antisense RNA 1 (head to head)	3.9	6.68	-6.84	0.0104
1555738_at	CMTM1	CKLF-like MARVEL transmembrane domain containing 1	6.23	7.53	-2.47	0.0105
1567287_at	CLDND1	claudin domain containing 1	5.26	2.51	6.72	0.0106
1552323_s_at	FAM122C	family with sequence similarity 122C	0.64	5.01	-20.64	0.0106
1557121_s_at	HEATR6	HEAT repeat containing 6	4.91	6.82	-3.78	0.0106
204383_at	DGCR14	DiGeorge syndrome critical region gene 14	9.55	8.47	2.11	0.0107
243724_at	SLC33A1	solute carrier family 33 (acetyl-CoA transporter), member 1	2.58	6.05	-11.05	0.0108
1564002_a_at	AK9	adenylate kinase 9	5.83	7.65	-3.52	0.0109
1562573_at	CYP17A1	cytochrome P450, family 17, subfamily A, polypeptide 1	4.65	2.1	5.84	0.0109
240602_at	HBS1L	HBS1-like translational GTPase	2.04	4.7	-6.31	0.0109
1558956_s_at	IFT80	intraflagellar transport 80	7.5	9.08	-2.99	0.011
1560372_at	LOC101929713	uncharacterized LOC101929713	0.02	3.4	-10.42	0.011
218540_at	THTPA	thiamine triphosphatase	6.22	7.4	-2.26	0.011
243668_at	MED28	mediator complex subunit 28	5.13	8.17	-8.23	0.011
243884_at	TEX26	testis expressed 26	6.78	3.6	9.09	0.011
235584_at	STARD7-AS1	STARD7 antisense RNA 1	5.93	7.41	-2.8	0.0111
205574_x_at	BMP1	bone morphogenetic protein 1	7.73	8.92	-2.29	0.0111
1558768_at	DNAH1	dynein, axonemal, heavy chain 1	3.85	7.08	-9.41	0.0111
210896_s_at	ASPH	aspartate beta-hydroxylase	9.95	10.66	-1.64	0.0113
225126_at	MRRF	mitochondrial ribosome recycling factor	8.66	9.68	-2.03	0.0113
205613_at	SYT17	synaptotagmin XVII	4.88	6.77	-3.7	0.0113
202681_at	USP4	ubiquitin specific peptidase 4 (proto-oncogene)	8.53	10.58	-4.16	0.0113
242219_at	LINC01588	long intergenic non-protein coding RNA 1588	2.79	5.42	-6.16	0.0113
236548_at	GIPC2	GIPC PDZ domain containing family, member 2	3.67	6.63	-7.8	0.0114
219153_s_at	THSD4	thrombospondin type 1 domain containing 4	8.83	10.17	-2.53	0.0114
220971_at	IL25	interleukin 25	5.08	2.85	4.67	0.0115
231792_at	MYLK2	myosin light chain kinase 2	8.76	7.31	2.73	0.0115
214631_at	ZBTB33	zinc finger and BTB domain containing 33	5.69	7.23	-2.93	0.0115
218509_at	PLPPR2	phospholipid phosphatase related 2	6.99	7.92	-1.9	0.0116
222805_at	MANEA	mannosidase, endo-alpha	7.09	7.96	-1.83	0.0117
207880_at	ADAM11	ADAM metallopeptidase domain 11	2.62	5.24	-6.17	0.0118
237338_at	B3GNT8	UDP-GlcNAc:betaGal beta-1,3-N-acetylglucosaminyltransferase 8	4	6.19	-4.54	0.0119
225553_at	CNIH1	cornichon family AMPA receptor auxiliary protein 1	8.4	9.43	-2.05	0.0119
214295_at	KIAA0485	uncharacterized LOC57235	5.22	0.27	30.72	0.0119
1555513_at	PIAS2	protein inhibitor of activated STAT 2	4.19	0.48	13.09	0.0119
227635_at	RBBP6	retinoblastoma binding protein 6	10.93	9.8	2.18	0.0119
230290_at	SCUBE3	signal peptide, CUB domain, EGF-like 3	3.2	6.44	-9.41	0.0119
238196_at	LOC285095	uncharacterized LOC285095	5.85	3.3	5.86	0.012
218639_s_at	ZXDC	ZXD family zinc finger C	5.9	7.95	-4.15	0.0121
214971_s_at	ST6GAL1	ST6 beta-galactosamide alpha-2,6-sialyltranferase 1	8.15	9.11	-1.93	0.0121
220077_at	CCDC134	coiled-coil domain containing 134	2.69	5.53	-7.16	0.0121
215485_s_at	ICAM1	intercellular adhesion molecule 1	11.39	10.22	2.25	0.0121
228507_at	PDE3A	phosphodiesterase 3A, cGMP-inhibited	1.06	4.82	-13.55	0.0123
224906_at	ANO6	anoctamin 6	9.36	10.56	-2.29	0.0124
223050_s_at	FBXW5	F-box and WD repeat domain containing 5	8.79	9.39	-1.52	0.0124
230105_at	HOXB13	homeobox B13	3.22	5.28	-4.17	0.0124
202726_at	LIG1	ligase I, DNA, ATP-dependent	9.39	8.44	1.92	0.0124
1554564_a_at	SPPL3	signal peptide peptidase like 3	4.38	5.72	-2.52	0.0124
1552970_s_at	ZMYM6	zinc finger, MYM-type 6	2.9	5.23	-5.02	0.0124
220367_s_at	SAP130	Sin3A associated protein 130kDa	8.15	9.08	-1.91	0.0125
228975_at	SP6	Sp6 transcription factor	5.18	7.43	-4.74	0.0125
1564591_a_at	TMC1	transmembrane channel like 1	2.7	5.23	-5.77	0.0125
227093_at	USP36	ubiquitin specific peptidase 36	6.9	8.61	-3.27	0.0125
212883_at	APOE	apolipoprotein E	2.98	5.9	-7.56	0.0126
1569433_at	SAMD5	sterile alpha motif domain containing 5	1.05	5.26	-18.48	0.0126
227435_at	USF3	upstream transcription factor family member 3	6.78	9.87	-8.54	0.0126
240411_at	MROH2B	maestro heat-like repeat family member 2B	2.91	5.39	-5.59	0.0128
224035_s_at	BCL2L13	BCL2-like 13 (apoptosis facilitator)	8.84	7.75	2.14	0.0128
241704_x_at	ZNF320	zinc finger protein 320	8.53	9.72	-2.28	0.013
230095_at	GLRX3	glutaredoxin 3	4.84	7.79	-7.71	0.013
238070_at	CHD1L	chromodomain helicase DNA binding protein 1-like	2.43	5.41	-7.86	0.0131
234922_s_at	NHSL1	NHS-like 1	9	8.35	1.57	0.0131
1555350_at	PPHLN1	periphilin 1	7.25	8.17	-1.89	0.0131
226814_at	ADAMTS9	ADAM metallopeptidase with thrombospondin type 1 motif 9	4.34	6.83	-5.6	0.0132
225051_at	EPB41	erythrocyte membrane protein band 4.1	10.82	11.88	-2.09	0.0132
205708_s_at	TRPM2	transient receptor potential cation channel, subfamily M, member 2	3.74	1.98	3.4	0.0133
239521_at	MFI2-AS1	MFI2 antisense RNA 1	6.13	4.88	2.37	0.0134
210228_at	CSF2	colony stimulating factor 2 (granulocyte-macrophage)	6.27	3.06	9.28	0.0135
237024_at	LSMEM2	leucine-rich single-pass membrane protein 2	5	3.79	2.31	0.0136
218630_at	MKS1	Meckel syndrome, type 1	6	7.42	-2.68	0.0136
220616_at	ZNF384	zinc finger protein 384	9.36	8.75	1.53	0.0137
228191_at	FLVCR1	feline leukemia virus subgroup C cellular receptor 1	5.37	7.34	-3.91	0.0138
233661_at	LINC00557	long intergenic non-protein coding RNA 557	1.27	3.93	-6.31	0.0138
240377_at	LOC101060429; LOC101930013; LOC102724993; NPIPA1; NPIPA2; NPIPA3; NPIPA5; NPIPA7; NPIPA8; PKD1; PKD1P1; PKD1P5	polycystin-1-like; NPIP-like protein 1; nuclear pore complex interacting protein family, member A1; nuclear pore complex interacting protein family, member A2; nuclear pore complex interacting protein family, member A3; nuclear pore complex interacting protein family, member A5; nuclear pore complex interacting protein family, member A7; nuclear pore complex interacting protein family, member A8;…	3.53	5.87	-5.05	0.0138
226662_at	STX17	syntaxin 17	6.83	9.15	-4.99	0.0138
221371_at	TNFSF18	tumor necrosis factor (ligand) superfamily, member 18	7.06	7.73	-1.59	0.0138
214547_at	ADCY10	adenylate cyclase 10 (soluble)	3.25	1.48	3.41	0.0139
206741_at	LOC105376948; SSUH2	uncharacterized LOC105376948; ssu-2 homolog (C. elegans)	1.19	4.17	-7.87	0.0139
1554572_a_at	SUV39H2	suppressor of variegation 3-9 homolog 2 (Drosophila)	7.23	8.58	-2.55	0.0139
226172_at	USP42	ubiquitin specific peptidase 42	6.27	8.14	-3.65	0.0139
239012_at	RNF144B	ring finger protein 144B	7.8	9.64	-3.57	0.014
1553686_at	C18orf25	chromosome 18 open reading frame 25	6.63	7.71	-2.11	0.014
1569421_at	CLDN4	claudin 4	3.29	5.71	-5.35	0.0141
219221_at	ZBTB38	zinc finger and BTB domain containing 38	9.15	10.36	-2.32	0.0141
212338_at	MYO1D	myosin ID	10.48	11.24	-1.7	0.0142
231793_s_at	CAMK2D	calcium/calmodulin-dependent protein kinase II delta	6.17	7.37	-2.29	0.0143
239268_at	NDUFS1	NADH dehydrogenase (ubiquinone) Fe-S protein 1, 75kDa (NADH-coenzyme Q reductase)	4.19	6.27	-4.23	0.0143
220815_at	CTNNA3	catenin (cadherin-associated protein), alpha 3	1.87	4.88	-8.04	0.0144
237286_at	INTS9	integrator complex subunit 9	4.46	6.25	-3.46	0.0144
205841_at	JAK2	Janus kinase 2	5.04	7.08	-4.11	0.0144
1555893_at	LOC105375624	uncharacterized LOC105375624	2.3	5.03	-6.62	0.0144
226760_at	MBTPS2	membrane bound transcription factor peptidase, site 2	8.54	9.3	-1.7	0.0144
206767_at	RBMS3	RNA binding motif, single stranded interacting protein 3	7.84	9.08	-2.38	0.0144
219352_at	HERC6	HECT and RLD domain containing E3 ubiquitin protein ligase family member 6	6.1	9	-7.45	0.0145
1552558_a_at	RAI1	retinoic acid induced 1	6.93	8.55	-3.06	0.0145
1553479_at	TMEM145	transmembrane protein 145	1.48	4.02	-5.8	0.0146
231288_at	CCDC88C	coiled-coil domain containing 88C	6.54	7.24	-1.62	0.0147
37586_at	ZNF142	zinc finger protein 142	5.8	7.64	-3.6	0.0147
1566557_at	BAIAP2-AS1	BAIAP2 antisense RNA 1 (head to head)	6.8	8.34	-2.89	0.0148
223339_at	ATPIF1	ATPase inhibitory factor 1	5.05	6.98	-3.81	0.0149
39705_at	SIN3B	SIN3 transcription regulator family member B	7.68	8.47	-1.73	0.015
236385_at	CHRFAM7A; CHRNA7; LOC101929970	CHRNA7 (cholinergic receptor, nicotinic, alpha 7, exons 5-10) and FAM7A (family with sequence similarity 7A, exons A-E) fusion; cholinergic receptor, nicotinic alpha 7; CHRNA7-FAM7A fusion protein	1.39	4.52	-8.78	0.015
220992_s_at	TRMT1L	tRNA methyltransferase 1 like	7.76	9.01	-2.37	0.0151
211372_s_at	IL1R2	interleukin 1 receptor, type II	6.08	5.34	1.67	0.0153
244526_at	RASGRP3	RAS guanyl releasing protein 3 (calcium and DAG-regulated)	1.5	5.02	-11.49	0.0154
210687_at	CPT1A	carnitine palmitoyltransferase 1A (liver)	4.8	7.27	-5.54	0.0155
215667_x_at	LOC441259; PMS2P1; PMS2P10; PMS2P2; PMS2P5; PMS2P6; PMS2P7	PMS1 homolog 2, mismatch repair system component pseudogene; PMS1 homolog 2, mismatch repair system component pseudogene 1; PMS1 homolog 2, mismatch repair system component pseudogene 10; PMS1 homolog 2, mismatch repair system component pseudogene 2; PMS1 homolog 2, mismatch repair system component pseudogene 5; PMS1 homolog 2, mismatch repair system component pseudogene 6; PMS1 homolog 2, mismat…	9.58	10.39	-1.75	0.0155
224077_at	WHSC1L1	Wolf-Hirschhorn syndrome candidate 1-like 1	2.37	1.02	2.54	0.0155
203426_s_at	IGFBP5	insulin like growth factor binding protein 5	8.13	10.14	-4.04	0.0156
217018_at	PDSS2	prenyl (decaprenyl) diphosphate synthase, subunit 2	3.32	6.94	-12.28	0.0156
1569521_s_at	ERAP1; LOC101929747	endoplasmic reticulum aminopeptidase 1; uncharacterized LOC101929747	2.82	6.42	-12.1	0.0157
211101_x_at	LILRA2	leukocyte immunoglobulin-like receptor, subfamily A (with TM domain), member 2	4.21	1.9	4.97	0.0157
1560715_at	P4HA3	prolyl 4-hydroxylase, alpha polypeptide III	3.39	5.3	-3.77	0.0157
217455_s_at	SSTR2	somatostatin receptor 2	0.35	2.06	-3.27	0.0157
1557528_at	STRADA	STE20-related kinase adaptor alpha	3.43	5.77	-5.07	0.0157
206201_s_at	MEOX2	mesenchyme homeobox 2	0.5	3.46	-7.73	0.0158
235109_at	ZBED3	zinc finger, BED-type containing 3	5.14	7.7	-5.91	0.0158
223426_s_at	EPB41L4B	erythrocyte membrane protein band 4.1 like 4B	1.9	4.54	-6.25	0.0159
221401_at	CACNG5	calcium channel, voltage-dependent, gamma subunit 5	2.53	5.4	-7.31	0.016
233385_x_at	MIA-RAB4B; RAB4B	MIA-RAB4B readthrough (NMD candidate); RAB4B, member RAS oncogene family	9.74	9.13	1.53	0.016
205872_x_at	PDE4DIP	phosphodiesterase 4D interacting protein	6.09	7.3	-2.32	0.016
1557258_a_at	BCL10	B-cell CLL/lymphoma 10	0.46	4.58	-17.32	0.0161
1556737_at	LINC00671	long intergenic non-protein coding RNA 671	1.39	3.9	-5.7	0.0161
214834_at	PWAR5	Prader Willi/Angelman region RNA 5	5.59	2.71	7.38	0.0161
1555370_a_at	CAMTA1	calmodulin binding transcription activator 1	5.72	7.24	-2.86	0.0162
209430_at	BTAF1	BTAF1 RNA polymerase II, B-TFIID transcription factor-associated, 170kDa	8.65	7.69	1.94	0.0164
223229_at	UBE2T	ubiquitin conjugating enzyme E2T	9.74	8.38	2.56	0.0164
208119_s_at	ZNF93	zinc finger protein 93	4.68	7.02	-5.04	0.0164
206235_at	LIG4	ligase IV, DNA, ATP-dependent	7.08	8.32	-2.36	0.0165
222192_s_at	LDAH	lipid droplet associated hydrolase	7.05	8.04	-1.98	0.0165
202637_s_at	ICAM1	intercellular adhesion molecule 1	12.03	11.35	1.61	0.0166
230131_x_at	ARSD	arylsulfatase D	8.63	9.57	-1.92	0.0167
235372_at	FCRLA	Fc receptor-like A	2.8	4.75	-3.88	0.0167
204486_at	KCNQ1OT1	KCNQ1 opposite strand/antisense transcript 1 (non-protein coding)	3.79	6.25	-5.5	0.0167
205496_at	KIAA0408	KIAA0408	0.23	3.84	-12.21	0.0167
204595_s_at	STC1	stanniocalcin 1	9.08	7.69	2.61	0.0169
243547_at	LINC00921	long intergenic non-protein coding RNA 921	3.37	5.83	-5.51	0.017
244643_at	LOC105375679	uncharacterized LOC105375679	1.57	3.74	-4.49	0.0171
209355_s_at	PLPP3	phospholipid phosphatase 3	8.85	8.25	1.51	0.0171
1559510_at	LINC00630	long intergenic non-protein coding RNA 630	3.24	5	-3.38	0.0172
223126_s_at	C1orf21	chromosome 1 open reading frame 21	7.1	8.35	-2.38	0.0173
211090_s_at	PRPF4B	pre-mRNA processing factor 4B	8.97	9.9	-1.91	0.0173
235940_at	C9orf64	chromosome 9 open reading frame 64	5.56	7.29	-3.34	0.0174
205909_at	POLE2	polymerase (DNA directed), epsilon 2, accessory subunit	6.04	7.9	-3.63	0.0175
231299_at	AGAP3	ArfGAP with GTPase domain, ankyrin repeat and PH domain 3	7.13	7.95	-1.77	0.0176
227701_at	CCDC186	coiled-coil domain containing 186	5.48	7.29	-3.51	0.0176
226632_at	CYGB	cytoglobin	5.04	6.9	-3.64	0.0176
236583_at	GIMAP1	GTPase, IMAP family member 1	4.07	6.94	-7.32	0.0176
223390_at	ARRDC1-AS1	ARRDC1 antisense RNA 1	6.41	4.85	2.96	0.0177
205818_at	BRINP1	bone morphogenetic protein/retinoic acid inducible neural-specific 1	3.52	5.45	-3.79	0.0177
228452_at	GID4	GID complex subunit 4 homolog	7.92	8.92	-2	0.0177
216176_at	HCRP1	hepatocellular carcinoma-related HCRP1	1.33	4.93	-12.16	0.0177
1560725_at	IL12A-AS1	IL12A antisense RNA 1	2.9	4.61	-3.29	0.0179
209822_s_at	VLDLR	very low density lipoprotein receptor	6.49	7.73	-2.35	0.018
202725_at	POLR2A	polymerase (RNA) II (DNA directed) polypeptide A, 220kDa	9.19	10.13	-1.92	0.0181
229609_at	LOC101929506; NUTM2A-AS1; NUTM2B-AS1	uncharacterized LOC101929506; NUTM2A antisense RNA 1; NUTM2B antisense RNA 1	4.96	3.48	2.78	0.0182
226206_at	MAFK	v-maf avian musculoaponeurotic fibrosarcoma oncogene homolog K	10.59	9.53	2.08	0.0182
229976_at	MORN5	MORN repeat containing 5	2.66	4.99	-5.01	0.0182
211665_s_at	SOS2	SOS Ras/Rho guanine nucleotide exchange factor 2	9.22	10.12	-1.87	0.0182
216300_x_at	RARA	retinoic acid receptor, alpha	9	8.19	1.75	0.0183
235242_at	REL	v-rel avian reticuloendotheliosis viral oncogene homolog	7.67	8.42	-1.68	0.0183
1557867_s_at	CFAP157	cilia and flagella associated protein 157	8.17	9.89	-3.29	0.0184
227983_at	RILPL2	Rab interacting lysosomal protein-like 2	11.03	9.94	2.13	0.0185
228968_at	ZNF449	zinc finger protein 449	6.84	8.48	-3.12	0.0185
235429_at	EIF3E	eukaryotic translation initiation factor 3, subunit E	6.1	7.74	-3.12	0.0188
205338_s_at	DCT	dopachrome tautomerase	5.98	4.54	2.71	0.0189
229758_at	TIGD5	tigger transposable element derived 5	6.76	7.77	-2.02	0.0189
230285_at	SVIP	small VCP/p97-interacting protein	7.99	9.2	-2.32	0.0189
223271_s_at	CTDSPL2	CTD small phosphatase like 2	8.32	9.36	-2.05	0.019
232014_at	ZNF30	zinc finger protein 30	7.96	9	-2.06	0.0191
211760_s_at	VAMP4	vesicle associated membrane protein 4	7.88	9.26	-2.62	0.0192
221505_at	ANP32E	acidic nuclear phosphoprotein 32 family member E	9.68	11.06	-2.61	0.0192
211059_s_at	GOLGA2	golgin A2	7.93	8.64	-1.64	0.0193
220566_at	PIK3R5	phosphoinositide-3-kinase, regulatory subunit 5	3.98	5.74	-3.39	0.0195
227562_at	LAMTOR3	late endosomal/lysosomal adaptor, MAPK and MTOR activator 3	6.63	8.05	-2.67	0.0196
212775_at	OBSL1	obscurin-like 1	9.04	10.07	-2.03	0.0196
1566739_at	PLCE1	phospholipase C, epsilon 1	2.11	4.59	-5.6	0.0196
1553186_x_at	RASEF	RAS and EF-hand domain containing	10.25	9.13	2.18	0.0196
206934_at	SIRPB1	signal-regulatory protein beta 1	3.14	4.96	-3.54	0.0196
226004_at	CABLES2	Cdk5 and Abl enzyme substrate 2	4.92	8.11	-9.13	0.0197
212611_at	DTX4	deltex 4, E3 ubiquitin ligase	8.03	7.39	1.56	0.0198
232509_at	LOC100996724	phosphodiesterase 4D interacting protein-like	2.69	5.62	-7.64	0.0198
223506_at	ZC3H8	zinc finger CCCH-type containing 8	7.29	9.14	-3.6	0.0198
226360_at	ZNRF3	zinc and ring finger 3	4.21	5.94	-3.32	0.0198
244564_at	LOC101927651	uncharacterized LOC101927651	2.42	4.77	-5.11	0.0199
214122_at	PDLIM7	PDZ and LIM domain 7 (enigma)	8.74	8.02	1.65	0.0199
208495_at	TLX3	T-cell leukemia homeobox 3	2.83	4.84	-4.04	0.0199
225056_at	SIPA1L2	signal-induced proliferation-associated 1 like 2	5.7	7.13	-2.68	0.0201
1553971_a_at	GATS	GATS, stromal antigen 3 opposite strand	5.78	7.6	-3.53	0.0202
229488_at	OTUD7B	OTU deubiquitinase 7B	7.25	8.28	-2.04	0.0202
209783_at	DBP	D site of albumin promoter (albumin D-box) binding protein	5.36	7.28	-3.8	0.0203
227179_at	STAU2	staufen double-stranded RNA binding protein 2	7.74	8.62	-1.85	0.0203
237287_at	LOC105376287	uncharacterized LOC105376287	5.38	3.43	3.87	0.0203
1555248_a_at	WNK3	WNK lysine deficient protein kinase 3	2.54	5.03	-5.59	0.0204
207555_s_at	TBXA2R	thromboxane A2 receptor	6.35	7.85	-2.83	0.0205
216119_s_at	SPEF1	sperm flagellar 1	4.37	6.38	-4.05	0.0206
242778_at	LPXN	leupaxin	4.19	5.85	-3.16	0.0207
238731_at	SETDB2	SET domain, bifurcated 2	4	6.22	-4.68	0.0207
226157_at	TFDP2	transcription factor Dp-2 (E2F dimerization partner 2)	7.63	8.42	-1.72	0.0207
207005_s_at	BCL2	B-cell CLL/lymphoma 2	7.11	5.18	3.81	0.0208
242554_at	TPCN2	two pore segment channel 2	4.9	1.63	9.65	0.0208
235442_at	CXorf56	chromosome X open reading frame 56	5.33	6.61	-2.43	0.021
231944_at	ERO1B	endoplasmic reticulum oxidoreductase beta	7.61	8.87	-2.4	0.021
218666_s_at	STX17	syntaxin 17	7.37	9.16	-3.46	0.0211
230736_at	SVIL-AS1	SVIL antisense RNA 1	3.65	6.4	-6.74	0.0211
225206_s_at	MTRF1L	mitochondrial translational release factor 1-like	10.88	10.14	1.67	0.0212
212963_at	TM2D1	TM2 domain containing 1	10.58	9.31	2.41	0.0212
238166_s_at	C17orf51	chromosome 17 open reading frame 51	5.56	7.02	-2.76	0.0213
215072_x_at	EDRF1	erythroid differentiation regulatory factor 1	2.37	4.26	-3.7	0.0214
243980_at	ZNF594	zinc finger protein 594	4.78	3.47	2.47	0.0214
216933_x_at	APC	adenomatous polyposis coli	8.01	10.07	-4.17	0.0215
223905_at	DRC7	dynein regulatory complex subunit 7	4.86	3.01	3.62	0.0215
228734_at	UBE2V2	ubiquitin conjugating enzyme E2 variant 2	4	6.25	-4.74	0.0215
220967_s_at	ZNF696	zinc finger protein 696	6.35	9.18	-7.11	0.0215
231041_at	POLR1E	polymerase (RNA) I polypeptide E	3.85	6.61	-6.77	0.0216
1564651_at	SMIM13	small integral membrane protein 13	6.35	8.06	-3.27	0.0216
224979_s_at	USP36	ubiquitin specific peptidase 36	5.87	7.87	-4	0.0216
228490_at	ABHD2	abhydrolase domain containing 2	8.33	9.36	-2.04	0.0217
218868_at	ACTR3B	ARP3 actin-related protein 3 homolog B (yeast)	5.29	7.1	-3.49	0.0217
234738_s_at	KLHDC4	kelch domain containing 4	2.98	4.85	-3.64	0.0217
212573_at	ENDOD1	endonuclease domain containing 1	8.21	8.93	-1.65	0.0218
225292_at	COL27A1	collagen, type XXVII, alpha 1	6.7	7.35	-1.56	0.022
233556_at	CRYBB2P1; LOC105372965	crystallin beta B2 pseudogene 1; uncharacterized LOC105372965	4.55	6.05	-2.83	0.022
229192_s_at	TBCD	tubulin folding cofactor D	5.65	7.16	-2.85	0.022
212880_at	WDR7	WD repeat domain 7	8.07	9.6	-2.9	0.022
222651_s_at	TRPS1	trichorhinophalangeal syndrome I	3.45	5.31	-3.64	0.0221
227433_at	USF3	upstream transcription factor family member 3	6.95	8.01	-2.09	0.0221
238945_at	ACER3	alkaline ceramidase 3	6.72	8.32	-3.03	0.0222
231987_at	CARMN	cardiac mesoderm enhancer-associated non-coding RNA	5.88	3.96	3.78	0.0222
242353_at	LOC105375620	basic salivary proline-rich protein 2-like	3.07	0.81	4.8	0.0222
231801_at	NFATC2	nuclear factor of activated T-cells, cytoplasmic, calcineurin-dependent 2	5.98	7.54	-2.94	0.0222
233001_at	SAMD10	sterile alpha motif domain containing 10	3.84	5.94	-4.29	0.0222
1555464_at	IFIH1	interferon induced, with helicase C domain 1	4.56	5.57	-2.02	0.0223
222506_at	LMBR1	limb development membrane protein 1	7.44	8.61	-2.26	0.0223
241534_at	LOC100505549	uncharacterized LOC100505549	4.69	5.42	-1.67	0.0223
1557257_at	BCL10	B-cell CLL/lymphoma 10	4.22	6.44	-4.67	0.0224
211230_s_at	PIK3CD	phosphatidylinositol-4,5-bisphosphate 3-kinase, catalytic subunit delta	4.23	5.98	-3.35	0.0224
235155_at	BDH2	3-hydroxybutyrate dehydrogenase, type 2	4.03	5.97	-3.85	0.0226
226927_at	C12orf73	chromosome 12 open reading frame 73	3.83	6.67	-7.16	0.0226
241553_at	LOC105369665	uncharacterized LOC105369665	1.78	3.69	-3.77	0.0227
213210_at	TAF6L	TAF6-like RNA polymerase II, p300/CBP-associated factor (PCAF)-associated factor, 65kDa	5.74	7.41	-3.17	0.0228
213386_at	TMEM246	transmembrane protein 246	6.62	7.87	-2.38	0.0228
1563466_at	MYLK	myosin light chain kinase	3.18	0.94	4.73	0.0229
221550_at	COX15	cytochrome c oxidase assembly homolog 15 (yeast)	8.94	10.68	-3.35	0.023
235174_s_at	LINC01003	long intergenic non-protein coding RNA 1003	4.74	7.06	-4.99	0.023
207626_s_at	SLC7A2	solute carrier family 7 (cationic amino acid transporter, y+ system), member 2	4.4	6.34	-3.83	0.0232
223128_at	FOXRED1	FAD-dependent oxidoreductase domain containing 1	7.45	8.32	-1.82	0.0232
205875_s_at	TREX1	three prime repair exonuclease 1	9.43	8.73	1.63	0.0232
1555282_a_at	PPARGC1B	peroxisome proliferator-activated receptor gamma, coactivator 1 beta	4.55	3.25	2.45	0.0234
228014_at	PTRH1	peptidyl-tRNA hydrolase 1 homolog	9.75	8.81	1.91	0.0235
224807_at	GRAMD1A	GRAM domain containing 1A	10.45	9.4	2.07	0.0236
1558919_a_at	SEC23IP	SEC23 interacting protein	2.23	6.07	-14.32	0.0237
230640_at	FMNL3	formin like 3	8.47	9.53	-2.09	0.0238
227046_at	SLC39A11	solute carrier family 39, member 11	6.41	8.05	-3.1	0.0238
203846_at	TRIM32	tripartite motif containing 32	7.77	8.37	-1.51	0.0238
215315_at	ZNF549	zinc finger protein 549	2.96	4.9	-3.84	0.0239
1555679_a_at	RTN4IP1	reticulon 4 interacting protein 1	6.95	8.08	-2.2	0.024
214718_at	GATAD1	GATA zinc finger domain containing 1	5.8	6.4	-1.52	0.0241
222917_s_at	TBX3	T-box 3	2.42	5.35	-7.62	0.0241
227206_at	NDUFA10	NADH dehydrogenase (ubiquinone) 1 alpha subcomplex, 10, 42kDa	4.77	6.28	-2.84	0.0241
1569183_a_at	CHM	choroideremia (Rab escort protein 1)	3.14	6.11	-7.82	0.0243
209261_s_at	NR2F6	nuclear receptor subfamily 2, group F, member 6	6.46	4.54	3.77	0.0243
228755_at	GIGYF1	GRB10 interacting GYF protein 1	6.45	8.16	-3.27	0.0244
223324_s_at	TRPM7	transient receptor potential cation channel, subfamily M, member 7	6.85	8.57	-3.29	0.0244
221683_s_at	CEP290	centrosomal protein 290kDa	8.02	8.8	-1.71	0.0246
241068_at	IGSF6	immunoglobulin superfamily, member 6	1.58	3.38	-3.48	0.0247
211427_s_at	KCNJ13	potassium channel, inwardly rectifying subfamily J, member 13	0.26	4.49	-18.76	0.0247
1562850_at	LOC101928283	uncharacterized LOC101928283	3.65	0.68	7.83	0.0247
217501_at	CIAO1	cytosolic iron-sulfur assembly component 1	7.4	9.14	-3.33	0.0248
217216_x_at	MLH3	mutL homolog 3	6.57	7.52	-1.93	0.0248
218326_s_at	LGR4	leucine-rich repeat containing G protein-coupled receptor 4	6.66	7.42	-1.69	0.0249
216027_at	TMX4	thioredoxin-related transmembrane protein 4	5.47	6.75	-2.42	0.0249
32259_at	EZH1	enhancer of zeste 1 polycomb repressive complex 2 subunit	7.91	8.96	-2.07	0.025
1562048_at	LOC152225	uncharacterized LOC152225	5.3	2.34	7.8	0.025
228714_at	LOC101927027	uncharacterized LOC101927027	5.93	7.27	-2.52	0.0251
1555808_a_at	EXD2	exonuclease 3'-5' domain containing 2	8.55	9.43	-1.84	0.0252
239363_at	INIP	INTS3 and NABP interacting protein	6.01	6.97	-1.95	0.0252
1564064_a_at	ATP11B	ATPase, class VI, type 11B	10.44	11.27	-1.78	0.0253
224847_at	CDK6	cyclin-dependent kinase 6	8.87	10.24	-2.58	0.0253
205466_s_at	HS3ST1	heparan sulfate (glucosamine) 3-O-sulfotransferase 1	5.79	7.08	-2.44	0.0253
235490_at	TMEM107	transmembrane protein 107	11.45	10.46	1.99	0.0253
230405_at	C5orf56	chromosome 5 open reading frame 56	9.12	8.18	1.92	0.0254
229092_at	NR2F2	nuclear receptor subfamily 2, group F, member 2	8.95	10.21	-2.4	0.0254
204555_s_at	PPP1R3D	protein phosphatase 1, regulatory subunit 3D	6.34	7.06	-1.65	0.0254
228384_s_at	PYROXD2	pyridine nucleotide-disulphide oxidoreductase domain 2	4.62	7.39	-6.83	0.0254
216083_s_at	NEU3	sialidase 3 (membrane sialidase)	4.98	7.87	-7.37	0.0255
209627_s_at	OSBPL3	oxysterol binding protein-like 3	7.46	9.1	-3.13	0.0256
206685_at	HCG4	HLA complex group 4 (non-protein coding)	1.35	4.39	-8.23	0.0258
219998_at	LGALSL	lectin, galactoside-binding-like	5.89	8.14	-4.77	0.0258
221047_s_at	MARK1	MAP/microtubule affinity-regulating kinase 1	2.04	5.72	-12.8	0.0258
236255_at	PLEKHG4B	pleckstrin homology domain containing, family G (with RhoGef domain) member 4B	4.93	2.35	5.97	0.0258
222096_x_at	LOC105376064; LOC105379438; LOC105379447	uncharacterized LOC105376064; uncharacterized LOC105379438; uncharacterized LOC105379447	4.71	6.03	-2.49	0.0259
210233_at	IL1RAP	interleukin 1 receptor accessory protein	3.97	5.74	-3.42	0.0259
235296_at	EIF5A2	eukaryotic translation initiation factor 5A2	6.18	7.86	-3.21	0.026
242560_at	FANCD2	Fanconi anemia complementation group D2	4.72	7.7	-7.85	0.026
225812_at	FAM229B	family with sequence similarity 229, member B	9.94	8.37	2.96	0.0261
226488_at	RCCD1	RCC1 domain containing 1	7.36	8.86	-2.82	0.0262
240002_at	LINC00937	long intergenic non-protein coding RNA 937	4.2	6.32	-4.36	0.0263
237460_x_at	LINC01588	long intergenic non-protein coding RNA 1588	2.55	5.12	-5.93	0.0263
230863_at	LRP2	LDL receptor related protein 2	0.86	3.38	-5.73	0.0263
206431_x_at	TBC1D9B	TBC1 domain family, member 9B (with GRAM domain)	8.14	8.74	-1.51	0.0263
1556351_at	HCN1	hyperpolarization activated cyclic nucleotide gated potassium channel 1	1.25	3.81	-5.92	0.0264
204883_s_at	HUS1	HUS1 checkpoint clamp component	9.08	9.76	-1.61	0.0264
1555760_a_at	RBM15	RNA binding motif protein 15	8.94	10.11	-2.25	0.0264
224070_at	AKR1C6P	aldo-keto reductase family 1, member C6, pseudogene	3.3	5.14	-3.58	0.0265
205044_at	GABRP	gamma-aminobutyric acid (GABA) A receptor, pi	2.97	5.12	-4.42	0.0265
223214_s_at	ZHX1	zinc fingers and homeoboxes 1	6.58	7.84	-2.39	0.0265
242879_x_at	AKT3	v-akt murine thymoma viral oncogene homolog 3	5.43	6.83	-2.64	0.0267
1562619_at	NME9	NME/NM23 family member 9	5.28	4.41	1.82	0.0267
211626_x_at	ERG	v-ets avian erythroblastosis virus E26 oncogene homolog	9.06	9.78	-1.65	0.0268
203309_s_at	HPS1	Hermansky-Pudlak syndrome 1	7.16	8.16	-2.01	0.0268
242307_at	ZNF789	zinc finger protein 789	2.57	5.86	-9.75	0.0268
205101_at	CIITA	class II, major histocompatibility complex, transactivator	4.68	6.14	-2.75	0.0269
1569608_x_at	LOC102723382; LOC102723891; LOC105379516; LOC105379552	ankyrin repeat domain-containing protein 20B-like; uncharacterized LOC105379516; uncharacterized LOC105379552	6.52	5.47	2.08	0.0269
227122_at	ZNF791	zinc finger protein 791	5.16	7.11	-3.88	0.0269
243696_at	CEP104	centrosomal protein 104kDa	2.38	4.58	-4.61	0.027
1564149_at	LOC102723927	uncharacterized LOC102723927	2.92	5.21	-4.88	0.027
236094_at	TCF7L2	transcription factor 7-like 2 (T-cell specific, HMG-box)	3.63	6.01	-5.22	0.027
239865_at	USP6NL	USP6 N-terminal like	3.26	5.76	-5.65	0.027
204474_at	ZNF142	zinc finger protein 142	6.32	8.34	-4.06	0.0271
209682_at	CBLB	Cbl proto-oncogene B, E3 ubiquitin protein ligase	8.33	9.22	-1.85	0.0272
224150_s_at	CEP70	centrosomal protein 70kDa	3.74	6.08	-5.07	0.0272
232506_s_at	C15orf41	chromosome 15 open reading frame 41	5.99	7.21	-2.34	0.0273
1554916_a_at	JRK	Jrk helix-turn-helix protein	5.17	5.95	-1.71	0.0273
212183_at	NUDT4	nudix hydrolase 4	8.54	9.51	-1.95	0.0273
235714_at	GANC	glucosidase, alpha; neutral C	3.67	6.05	-5.22	0.0275
219262_at	SUV39H2	suppressor of variegation 3-9 homolog 2 (Drosophila)	5.76	6.56	-1.75	0.0276
1554451_s_at	DNAJC14	DnaJ (Hsp40) homolog, subfamily C, member 14	9.68	10.6	-1.89	0.0277
241821_at	LINC00908	long intergenic non-protein coding RNA 908	2.92	4.86	-3.83	0.0277
231886_at	LOC100134822	uncharacterized LOC100134822	3.91	5.51	-3.03	0.0277
212292_at	SLC7A1	solute carrier family 7 (cationic amino acid transporter, y+ system), member 1	6.09	8.16	-4.2	0.0277
217497_at	TYMP	thymidine phosphorylase	4.73	6.11	-2.6	0.0278
229697_at	HIRIP3	HIRA interacting protein 3	4.22	5.81	-3.01	0.028
206452_x_at	PPP2R4	protein phosphatase 2A activator, regulatory subunit 4	11.17	10.4	1.7	0.0281
201036_s_at	HADH	hydroxyacyl-CoA dehydrogenase	8.04	8.86	-1.76	0.0282
205617_at	PRRG2	proline rich Gla (G-carboxyglutamic acid) 2	6.54	5.69	1.81	0.0282
211519_s_at	KIF2C	kinesin family member 2C	6.14	7.44	-2.46	0.0283
1570402_at	KLC3	kinesin light chain 3	2.42	3.91	-2.8	0.0283
234852_at	TRAV22	T cell receptor alpha variable 22	1.55	4.12	-5.95	0.0283
241066_at	ZNF449	zinc finger protein 449	6.06	7.82	-3.39	0.0283
239700_at	ZNF710	zinc finger protein 710	5.04	6.05	-2.01	0.0283
1570182_at	LOC101927539	uncharacterized LOC101927539	6.71	5.91	1.74	0.0284
237088_at	LINC00244	long intergenic non-protein coding RNA 244	6.02	2.85	9.04	0.0285
223268_at	C11orf54	chromosome 11 open reading frame 54	7.21	8.16	-1.93	0.0286
214804_at	CENPI	centromere protein I	8.72	7.16	2.95	0.0286
208530_s_at	RARB	retinoic acid receptor, beta	7.35	8.52	-2.25	0.0287
235858_at	CREBBP	CREB binding protein	5.18	6.49	-2.48	0.0288
205731_s_at	NCOA2	nuclear receptor coactivator 2	5.35	8.64	-9.83	0.0288
243735_at	ELP2	elongator acetyltransferase complex subunit 2	4.23	6.15	-3.78	0.029
203253_s_at	PPIP5K2	diphosphoinositol pentakisphosphate kinase 2	7.74	9.05	-2.49	0.029
220339_s_at	TPSG1	tryptase gamma 1	4.52	2.93	3.01	0.029
241321_at	CNNM3	cyclin and CBS domain divalent metal cation transport mediator 3	3.09	4.41	-2.49	0.0291
235635_at	ARHGAP5	Rho GTPase activating protein 5	5.76	7.05	-2.43	0.0292
221399_at	EDA2R	ectodysplasin A2 receptor	5.47	6.76	-2.44	0.0292
1559840_s_at	TBX18	T-box 18	7.38	8.24	-1.82	0.0294
228156_at	ZNF782	zinc finger protein 782	4.77	6.89	-4.35	0.0294
203875_at	SMARCA1	SWI/SNF related, matrix associated, actin dependent regulator of chromatin, subfamily a, member 1	9.78	10.62	-1.8	0.0295
204632_at	RPS6KA4	ribosomal protein S6 kinase, 90kDa, polypeptide 4	9.24	8.55	1.61	0.0298
201799_s_at	OSBP	oxysterol binding protein	8.07	8.9	-1.78	0.0299
220849_at	LOC79999	uncharacterized LOC79999	4.4	5.71	-2.47	0.0301
204329_s_at	ZNF202	zinc finger protein 202	2.53	7.02	-22.51	0.0302
215343_at	CCDC88C; LOC105370624	coiled-coil domain containing 88C; uncharacterized LOC105370624	1.78	4.75	-7.86	0.0302
232156_at	AP5M1	adaptor-related protein complex 5, mu 1 subunit	5.43	6.47	-2.05	0.0303
223912_s_at	CLN8	ceroid-lipofuscinosis, neuronal 8	5.72	7.36	-3.13	0.0303
230769_at	DENND2C	DENN/MADD domain containing 2C	5.13	7.18	-4.14	0.0303
220042_x_at	HIVEP3	human immunodeficiency virus type I enhancer binding protein 3	5.34	6.65	-2.49	0.0304
1569452_at	LOC692247	uncharacterized LOC692247	4.41	5.39	-1.97	0.0304
204691_x_at	PLA2G6	phospholipase A2, group VI (cytosolic, calcium-independent)	3.64	5.7	-4.17	0.0304
212073_at	CSNK2A1	casein kinase 2, alpha 1 polypeptide	9.66	10.37	-1.64	0.0306
235215_at	ERCC4	excision repair cross-complementation group 4	6.09	8.15	-4.16	0.0306
205807_s_at	TUFT1	tuftelin 1	7.21	8.5	-2.44	0.0306
210535_at	B9D1	B9 protein domain 1	6.16	7.47	-2.48	0.0308
232353_s_at	STYXL1	serine/threonine/tyrosine interacting-like 1	10.74	9.74	2	0.0308
224861_at	GNAQ	guanine nucleotide binding protein (G protein), q polypeptide	7.72	9.2	-2.79	0.0309
228391_at	CYP4V2; KLKB1	cytochrome P450, family 4, subfamily V, polypeptide 2; kallikrein B1	6	8.22	-4.66	0.031
205028_at	TRO	trophinin	1.62	2.91	-2.44	0.031
1553468_at	HYDIN2	HYDIN2, axonemal central pair apparatus protein (pseudogene)	0.75	2.94	-4.56	0.0311
214022_s_at	IFITM1	interferon induced transmembrane protein 1	1.48	4.58	-8.6	0.0311
1559989_at	TPM4	tropomyosin 4	4.06	5.95	-3.7	0.0311
222110_at	SENP5	SUMO1/sentrin specific peptidase 5	9.02	9.61	-1.51	0.0312
223898_at	ZNF670	zinc finger protein 670	5.46	6.79	-2.52	0.0313
205771_s_at	AKAP7	A kinase (PRKA) anchor protein 7	5.13	7	-3.68	0.0314
1556750_at	LOC153577	uncharacterized LOC153577	4.36	6.9	-5.83	0.0315
207125_at	ZNF225	zinc finger protein 225	6.18	7.64	-2.76	0.0316
206175_x_at	ZNF222	zinc finger protein 222	3.74	6.4	-6.32	0.0316
225081_s_at	CDCA7L	cell division cycle associated 7-like	10.23	10.97	-1.67	0.0317
210812_at	XRCC4	X-ray repair complementing defective repair in Chinese hamster cells 4	4.73	7.38	-6.26	0.0317
210348_at	2004-09-01	septin 4	2.57	5.45	-7.32	0.0318
227616_at	BCL9L	B-cell CLL/lymphoma 9-like	9.41	10.57	-2.23	0.0318
1554447_at	JPX	JPX transcript, XIST activator (non-protein coding)	6.85	8.56	-3.27	0.0319
210210_at	MPZL1	myelin protein zero-like 1	3.4	5.11	-3.26	0.0319
225185_at	MRAS	muscle RAS oncogene homolog	4.03	5.72	-3.23	0.0319
237666_at	XRRA1	X-ray radiation resistance associated 1	3.25	2.04	2.31	0.0319
241625_at	LOC389834	ankyrin repeat domain 57 pseudogene	4.03	5.88	-3.62	0.032
204978_at	CLASRP	CLK4-associating serine/arginine rich protein	10.13	9.34	1.73	0.0321
207037_at	TNFRSF11A	tumor necrosis factor receptor superfamily, member 11a, NFKB activator	4.9	6.13	-2.36	0.0322
214163_at	HSPB11	heat shock protein family B (small), member 11	2.56	0.11	5.48	0.0322
239620_at	TTC23L	tetratricopeptide repeat domain 23-like	5.05	2.96	4.25	0.0323
34697_at	LRP6	LDL receptor related protein 6	6.5	8.09	-3.02	0.0324
205166_at	CAPN5	calpain 5	9.94	9.23	1.64	0.0325
1552314_a_at	EYA3	EYA transcriptional coactivator and phosphatase 3	6.69	8.09	-2.64	0.0325
1559674_at	ZNF333	zinc finger protein 333	4.78	2.51	4.82	0.0326
229984_at	DTWD1	DTW domain containing 1	7.2	8.74	-2.89	0.0327
230146_s_at	NCS1	neuronal calcium sensor 1	6.34	7.18	-1.79	0.0327
1553856_s_at	P2RY10	purinergic receptor P2Y, G-protein coupled, 10	3.85	5.18	-2.5	0.0327
213636_at	PHF24	PHD finger protein 24	5.42	3.69	3.32	0.0327
241752_at	SLC8A1	solute carrier family 8 (sodium/calcium exchanger), member 1	5.69	6.78	-2.12	0.0327
229603_at	BBS12	Bardet-Biedl syndrome 12	5.91	6.92	-2.02	0.0328
227533_at	RALGPS2	Ral GEF with PH domain and SH3 binding motif 2	8.46	9.63	-2.26	0.0328
206233_at	B4GALT6	UDP-Gal:betaGlcNAc beta 1,4- galactosyltransferase, polypeptide 6	5.83	6.94	-2.15	0.0328
235204_at	ENTPD7	ectonucleoside triphosphate diphosphohydrolase 7	7.61	8.95	-2.52	0.0329
240294_at	HIPK2	homeodomain interacting protein kinase 2	4.89	6.77	-3.69	0.0331
208283_at	GAGE1	G antigen 1	5.07	1.97	8.54	0.0333
229885_at	RSF1	remodeling and spacing factor 1	6.18	7.43	-2.38	0.0333
226890_at	WDR35	WD repeat domain 35	4.97	7	-4.1	0.0333
226124_at	ZFP90	ZFP90 zinc finger protein	7.65	8.95	-2.47	0.0333
212069_s_at	PRRC2B	proline-rich coiled-coil 2B	8	9.27	-2.41	0.0334
222959_at	CNGB3	cyclic nucleotide gated channel beta 3	4.7	2.4	4.93	0.0335
244439_at	SPRED1	sprouty-related, EVH1 domain containing 1	7.33	8.07	-1.67	0.0335
207605_x_at	ZNF117	zinc finger protein 117	9.09	9.72	-1.55	0.0335
57516_at	ZNF764	zinc finger protein 764	7.17	8.26	-2.13	0.0336
209792_s_at	KLK10	kallikrein related peptidase 10	1.62	6.31	-25.86	0.0337
220797_at	METTL16	methyltransferase like 16	5.28	6.33	-2.07	0.0337
223668_at	CBLC	Cbl proto-oncogene C, E3 ubiquitin protein ligase	3.07	5.06	-3.98	0.0339
214987_at	GAB1	GRB2-associated binding protein 1	5.28	8.38	-8.58	0.034
1556004_at	LOC101928817	uncharacterized LOC101928817	2.14	3.95	-3.51	0.034
1559344_at	LOC101929064	uncharacterized LOC101929064	4.55	2.77	3.41	0.034
238087_at	RTCA	RNA 3'-terminal phosphate cyclase	8.04	9.1	-2.09	0.034
214776_x_at	XYLB	xylulokinase homolog (H. influenzae)	3.71	5.47	-3.37	0.0341
203199_s_at	MTRR	5-methyltetrahydrofolate-homocysteine methyltransferase reductase	4.6	6.16	-2.94	0.0342
223539_s_at	SERF1A; SERF1B	small EDRK-rich factor 1A (telomeric); small EDRK-rich factor 1B (centromeric)	10.66	9.59	2.1	0.0342
1552364_s_at	MSI2	musashi RNA binding protein 2	6.76	8.03	-2.41	0.0343
241372_at	ZC3H6	zinc finger CCCH-type containing 6	4.88	7.4	-5.73	0.0343
225904_at	CCSAP	centriole, cilia and spindle-associated protein	5.83	7.19	-2.58	0.0344
203979_at	CYP27A1	cytochrome P450, family 27, subfamily A, polypeptide 1	11.16	9.96	2.29	0.0344
242893_at	LURAP1L-AS1	LURAP1L antisense RNA 1	2.15	4.54	-5.25	0.0345
225196_s_at	MRPS26	mitochondrial ribosomal protein S26	10.15	8.69	2.76	0.0345
204838_s_at	MLH3	mutL homolog 3	6.08	7.16	-2.12	0.0346
210837_s_at	PDE4D	phosphodiesterase 4D, cAMP-specific	5.77	7.19	-2.68	0.0346
204673_at	MUC2	mucin 2, oligomeric mucus/gel-forming	2.52	4.3	-3.43	0.0347
226879_at	HVCN1	hydrogen voltage gated channel 1	5.96	6.99	-2.04	0.0347
241908_at	BROX	BRO1 domain and CAAX motif containing	6.87	8.27	-2.66	0.0348
214788_x_at	DDN	dendrin	5.95	5.25	1.63	0.0348
226807_at	ZFP1	ZFP1 zinc finger protein	4.96	6.87	-3.76	0.0348
237960_at	CEP112	centrosomal protein 112kDa	2.63	5.3	-6.4	0.0349
1570441_at	NAPB	N-ethylmaleimide-sensitive factor attachment protein, beta	1.45	4.32	-7.29	0.0349
201788_at	DDX42	DEAD (Asp-Glu-Ala-Asp) box helicase 42	10.26	11.38	-2.17	0.035
227155_at	LMO4	LIM domain only 4	5.08	6.74	-3.17	0.0351
228627_at	TLK2	tousled-like kinase 2	6.88	7.58	-1.62	0.0351
201335_s_at	ARHGEF12	Rho guanine nucleotide exchange factor (GEF) 12	4.12	7.66	-11.58	0.0352
200069_at	SART3	squamous cell carcinoma antigen recognized by T-cells 3	6.04	8.02	-3.94	0.0353
205509_at	CPB1	carboxypeptidase B1 (tissue)	4.98	2.02	7.78	0.0354
1553130_at	LOC652276	potassium channel tetramerization domain containing 5 pseudogene	4.96	7.55	-6.04	0.0355
239161_at	FDX1	ferredoxin 1	4.51	6.81	-4.92	0.0356
220949_s_at	C7orf49	chromosome 7 open reading frame 49	7.98	8.66	-1.6	0.0357
239889_at	SERP2	stress-associated endoplasmic reticulum protein family member 2	6.79	3.16	12.35	0.0358
1553695_a_at	NLRX1	NLR family member X1	3.58	6.88	-9.88	0.036
213546_at	DKFZP586I1420	uncharacterized protein DKFZp586I1420	3.85	6.36	-5.7	0.0361
222866_s_at	FLVCR2	feline leukemia virus subgroup C cellular receptor family, member 2	5.61	6.8	-2.27	0.0361
229715_at	NCR3LG1	natural killer cell cytotoxicity receptor 3 ligand 1	6.35	4.51	3.6	0.0361
219729_at	PRRX2	paired related homeobox 2	4.52	5.8	-2.42	0.0361
240667_at	SERP2	stress-associated endoplasmic reticulum protein family member 2	5.26	4.02	2.37	0.0362
223773_s_at	SNHG12	small nucleolar RNA host gene 12	12.54	11.7	1.8	0.0362
226380_at	PTPN21	protein tyrosine phosphatase, non-receptor type 21	6.98	8.87	-3.69	0.0363
214877_at	CDKAL1	CDK5 regulatory subunit associated protein 1-like 1	7.22	8.59	-2.59	0.0364
209512_at	HSDL2	hydroxysteroid dehydrogenase like 2	7.68	8.43	-1.67	0.0364
209519_at	NCBP1	nuclear cap binding protein subunit 1	4.12	6.26	-4.38	0.0364
222824_at	NUDT5	nudix hydrolase 5	7.26	9.04	-3.45	0.0364
221757_at	PIK3IP1	phosphoinositide-3-kinase interacting protein 1	7.45	8.53	-2.11	0.0364
236313_at	CDKN2B	cyclin-dependent kinase inhibitor 2B (p15, inhibits CDK4)	8.91	8.26	1.56	0.0365
212793_at	DAAM2	dishevelled associated activator of morphogenesis 2	4.23	6.16	-3.81	0.0365
203766_s_at	LMOD1	leiomodin 1 (smooth muscle)	3.39	1.96	2.7	0.0366
1561474_at	LOC101929312	uncharacterized LOC101929312	4.38	1.83	5.86	0.0366
209597_s_at	PNMA2	paraneoplastic Ma antigen 2	7.85	9.08	-2.35	0.0367
225615_at	IFFO2	intermediate filament family orphan 2	10.14	9.22	1.89	0.0368
214976_at	RPL13	ribosomal protein L13	8.82	7.91	1.87	0.0368
231852_at	ERI1	exoribonuclease 1	7.32	8.04	-1.64	0.0369
204569_at	ICK	intestinal cell (MAK-like) kinase	6.74	8.47	-3.33	0.0369
206146_s_at	RHAG	Rh-associated glycoprotein	3.51	5.75	-4.74	0.0369
229883_at	GRIN2D	glutamate receptor, ionotropic, N-methyl D-aspartate 2D	6.78	7.56	-1.72	0.037
238251_at	LOC105377391	uncharacterized LOC105377391	2.97	0.59	5.19	0.037
1557322_at	ZNF230	zinc finger protein 230	5.38	4.57	1.76	0.037
202545_at	PRKCD	protein kinase C, delta	6.24	7.27	-2.04	0.0371
219573_at	LRRC16A	leucine rich repeat containing 16A	2.75	4.97	-4.68	0.0372
241812_at	SPATS2L	spermatogenesis associated, serine-rich 2-like	3.44	5.77	-5.06	0.0372
210736_x_at	DTNA	dystrobrevin, alpha	3.8	5.54	-3.34	0.0373
205521_at	EXOG	endo/exonuclease (5'-3'), endonuclease G-like	7.52	9.18	-3.17	0.0373
226809_at	FAR2P2; FAR2P3	fatty acyl-CoA reductase 2 pseudogene 2; fatty acyl-CoA reductase 2 pseudogene 3	4.23	6.01	-3.45	0.0373
225461_at	EHMT1	euchromatic histone-lysine N-methyltransferase 1	7.55	8.27	-1.64	0.0374
202925_s_at	PLAGL2	pleiomorphic adenoma gene-like 2	4.25	6.52	-4.81	0.0375
226636_at	PLD1	phospholipase D1, phosphatidylcholine-specific	9.36	10.12	-1.69	0.0376
236006_s_at	AKAP10	A kinase (PRKA) anchor protein 10	3.58	7.61	-16.39	0.0377
206294_at	HSD3B2	hydroxy-delta-5-steroid dehydrogenase, 3 beta- and steroid delta-isomerase 2	2.87	4.83	-3.89	0.0377
241568_at	LOC100506319	uncharacterized LOC100506319	3.29	4.56	-2.41	0.0377
233980_s_at	VWF	von Willebrand factor	7.9	9.2	-2.47	0.0377
1554445_at	ZNF85	zinc finger protein 85	7.69	8.86	-2.25	0.0377
240886_at	CASR	calcium-sensing receptor	3.58	5.3	-3.29	0.0378
234469_at	OR51B4	olfactory receptor, family 51, subfamily B, member 4	3.1	0.97	4.4	0.0378
225099_at	FBXO45	F-box protein 45	8.26	9.61	-2.54	0.0379
230811_at	SPATA33	spermatogenesis associated 33	9.29	7.61	3.21	0.0379
1555300_a_at	MED12L	mediator complex subunit 12 like	1.63	4.11	-5.6	0.0381
213853_at	DNAJC24	DnaJ (Hsp40) homolog, subfamily C, member 24	8.02	6.25	3.4	0.0382
1553612_at	ZNF354B	zinc finger protein 354B	4.99	6.6	-3.05	0.0382
1569554_at	ESR2	estrogen receptor 2 (ER beta)	2.94	4.63	-3.23	0.0383
214602_at	COL4A4	collagen, type IV, alpha 4	4.83	1.74	8.49	0.0384
1555141_a_at	SLC9B1	solute carrier family 9, subfamily B (NHA1, cation proton antiporter 1), member 1	0.51	3.39	-7.35	0.0385
225783_at	UBE2F	ubiquitin-conjugating enzyme E2F (putative)	10.99	10.22	1.71	0.0385
231243_s_at	BHLHE41	basic helix-loop-helix family, member e41	2.44	5.02	-5.97	0.0388
223441_at	SLC17A5	solute carrier family 17 (acidic sugar transporter), member 5	9.35	10	-1.58	0.0388
229491_at	SLC9B2	solute carrier family 9, subfamily B (NHA2, cation proton antiporter 2), member 2	6.71	8.42	-3.28	0.0388
214511_x_at	FCGR1B	Fc fragment of IgG, high affinity Ib, receptor (CD64)	5.15	1.67	11.16	0.039
229024_at	RNF150	ring finger protein 150	2.69	4.34	-3.13	0.039
239761_at	GCNT1	glucosaminyl (N-acetyl) transferase 1, core 2	4.49	6.77	-4.88	0.039
229600_s_at	CPD	carboxypeptidase D	7.82	8.68	-1.82	0.0393
235198_at	OSTM1	osteopetrosis associated transmembrane protein 1	4.75	6.17	-2.68	0.0394
206607_at	CBL	Cbl proto-oncogene, E3 ubiquitin protein ligase	5.36	7.28	-3.8	0.0395
210581_x_at	PATZ1	POZ (BTB) and AT hook containing zinc finger 1	6.69	7.29	-1.52	0.0396
213218_at	ZSCAN26	zinc finger and SCAN domain containing 26	7.25	8.24	-1.99	0.0398
220076_at	ANKH	ANKH inorganic pyrophosphate transport regulator	2.82	5.61	-6.92	0.0399
234894_at	ITIH6	inter-alpha-trypsin inhibitor heavy chain family, member 6	4.53	3.23	2.45	0.0399
1559546_s_at	SNRPN	small nuclear ribonucleoprotein polypeptide N	2.43	5.45	-8.12	0.0401
220710_at	ANP32A-IT1	ANP32A intronic transcript 1	1.56	4.79	-9.38	0.0402
209642_at	BUB1	BUB1 mitotic checkpoint serine/threonine kinase	4.87	7.36	-5.64	0.0403
230874_at	SLC36A4	solute carrier family 36 (proton/amino acid symporter), member 4	4.39	5.17	-1.71	0.0403
235273_at	DYX1C1	dyslexia susceptibility 1 candidate 1	8.58	9.27	-1.62	0.0403
242577_at	LOC389834	ankyrin repeat domain 57 pseudogene	5.63	6.54	-1.87	0.0404
211356_x_at	LEPR	leptin receptor	6.2	7.9	-3.25	0.0404
227119_at	CNOT6L	CCR4-NOT transcription complex subunit 6-like	8.09	9.23	-2.2	0.0405
242385_at	RORB	RAR-related orphan receptor B	0.77	3.89	-8.68	0.0405
209930_s_at	NFE2	nuclear factor, erythroid 2	5.05	3.4	3.15	0.0406
230133_at	RC3H2	ring finger and CCCH-type domains 2	7.81	8.98	-2.24	0.0406
201382_at	CACYBP	calcyclin binding protein	6.2	7.31	-2.16	0.0407
221677_s_at	DONSON	downstream neighbor of SON	8.86	9.56	-1.62	0.0407
1556913_a_at	GIT2	G protein-coupled receptor kinase interacting ArfGAP 2	4.96	2.68	4.88	0.0407
206842_at	KCND1	potassium channel, voltage gated Shal related subfamily D, member 1	3.14	4.91	-3.4	0.0407
209736_at	SOX13	SRY box 13	7.08	8.14	-2.09	0.0407
1555517_at	GABRG3	gamma-aminobutyric acid (GABA) A receptor, gamma 3	5.17	2.28	7.37	0.0408
230744_at	FSTL1	follistatin like 1	4.16	5.98	-3.54	0.0409
35436_at	GOLGA2	golgin A2	9.1	10.02	-1.9	0.0409
225833_at	DAGLB	diacylglycerol lipase, beta	5.93	7.74	-3.49	0.041
218691_s_at	PDLIM4	PDZ and LIM domain 4	8.16	7.13	2.05	0.041
1563018_at	TBX5	T-box 5	5.71	3.22	5.61	0.041
227839_at	MBD5	methyl-CpG binding domain protein 5	5.28	6.88	-3.04	0.0412
221609_s_at	WNT6	wingless-type MMTV integration site family, member 6	3.66	5.78	-4.35	0.0412
215807_s_at	PLXNB1	plexin B1	7.07	7.96	-1.86	0.0413
223323_x_at	TRPM7	transient receptor potential cation channel, subfamily M, member 7	7.96	8.82	-1.81	0.0414
215570_s_at	ZNF780A; ZNF780B	zinc finger protein 780A; zinc finger protein 780B	4.4	7.17	-6.8	0.0414
240392_at	LOC105371920	uncharacterized LOC105371920	4.44	5.92	-2.79	0.0415
225679_at	NAA30	N(alpha)-acetyltransferase 30, NatC catalytic subunit	10.02	10.83	-1.76	0.0415
1555793_a_at	ZFP82	ZFP82 zinc finger protein	2.88	5.79	-7.54	0.0415
232202_at	FAM83B	family with sequence similarity 83, member B	5.15	2.87	4.84	0.0416
1559837_at	LINC01490	long intergenic non-protein coding RNA 1490	4.31	2.08	4.67	0.0416
1559190_s_at	RDH13	retinol dehydrogenase 13 (all-trans/9-cis)	1.37	6.74	-41.49	0.0416
226213_at	ERBB3	erb-b2 receptor tyrosine kinase 3	4.16	2.19	3.92	0.0417
212870_at	SOS2	SOS Ras/Rho guanine nucleotide exchange factor 2	9.11	9.94	-1.78	0.0418
1567223_at	HMGA2	high mobility group AT-hook 2	7.66	6.5	2.23	0.0419
211089_s_at	NEK3	NIMA-related kinase 3	7.33	8.64	-2.47	0.042
1553185_at	RASEF	RAS and EF-hand domain containing	10.72	9.39	2.53	0.042
228637_at	ZDHHC1	zinc finger, DHHC-type containing 1	5.36	6.54	-2.26	0.0421
229970_at	KBTBD7	kelch repeat and BTB (POZ) domain containing 7	2.95	5.07	-4.35	0.0422
240951_at	RORA	RAR-related orphan receptor A	7.51	6.15	2.56	0.0422
1553685_s_at	SP1	Sp1 transcription factor	9.65	10.56	-1.87	0.0424
228563_at	GJC1	gap junction protein gamma 1	6.14	6.84	-1.62	0.0425
219135_s_at	LMF1	lipase maturation factor 1	5.53	7.2	-3.19	0.0425
216486_x_at	ZNF79	zinc finger protein 79	7.2	8.29	-2.13	0.0425
1554637_a_at	CBFA2T2	core-binding factor, runt domain, alpha subunit 2; translocated to, 2	7.58	8.37	-1.72	0.0426
232072_at	NAAA	N-acylethanolamine acid amidase	4.91	6.78	-3.67	0.0428
206357_at	OPA3	optic atrophy 3 (autosomal recessive, with chorea and spastic paraplegia)	5.62	7.65	-4.07	0.0429
206850_at	RASL10A	RAS-like, family 10, member A	5.09	2.52	5.97	0.0429
220648_at	ADARB2	adenosine deaminase, RNA-specific, B2 (inactive)	1.23	3.46	-4.71	0.043
231244_at	CASD1	CAS1 domain containing 1	6.12	7.17	-2.07	0.043
1561273_at	HOXC-AS3	HOXC cluster antisense RNA 3	3.47	5.59	-4.34	0.0433
206378_at	SCGB2A2	secretoglobin, family 2A, member 2	5.25	3.04	4.63	0.0434
1568735_at	DLGAP1	discs, large (Drosophila) homolog-associated protein 1	1.54	3.88	-5.04	0.0435
242393_x_at	AGAP9; BMS1P5; LOC102724455	ArfGAP with GTPase domain, ankyrin repeat and PH domain 9; BMS1 ribosome biogenesis factor pseudogene 5; uncharacterized LOC102724455	7.25	8.69	-2.71	0.0435
222830_at	GRHL1	grainyhead-like transcription factor 1	3.3	4.77	-2.77	0.0436
203986_at	FAM47E-STBD1; STBD1	FAM47E-STBD1 readthrough; starch binding domain 1	4.78	5.71	-1.91	0.0438
1559777_at	MIR3945HG	MIR3945 host gene	2.41	4.19	-3.44	0.0439
214651_s_at	HOXA10-HOXA9; HOXA9	HOXA10-HOXA9 readthrough; homeobox A9	9.62	8.93	1.61	0.044
234992_x_at	ECT2	epithelial cell transforming 2	7.4	8.45	-2.07	0.0441
230218_at	HIC1	hypermethylated in cancer 1	10.12	9.4	1.65	0.0446
205953_at	LRIG2	leucine-rich repeats and immunoglobulin-like domains 2	6.6	4.59	4.04	0.0446
207627_s_at	TFCP2	transcription factor CP2	6.35	7.3	-1.93	0.0446
210203_at	CNOT4	CCR4-NOT transcription complex subunit 4	5.36	7.44	-4.23	0.0447
229138_at	PARP11	poly(ADP-ribose) polymerase family member 11	6.87	8.3	-2.7	0.0447
1555091_at	PPM1F	protein phosphatase, Mg2+/Mn2+ dependent, 1F	5.52	7.04	-2.87	0.0447
213691_at	PTOV1-AS2	PTOV1 antisense RNA 2	4.25	6.57	-5	0.0447
230074_s_at	LOC105371171	uncharacterized LOC105371171	2.09	3.79	-3.25	0.0448
1564049_at	LOC339593	uncharacterized LOC339593	0.52	3.59	-8.35	0.0448
223542_at	SLF1	SMC5-SMC6 complex localization factor 1	5.9	7.15	-2.38	0.0448
207887_s_at	CALCR	calcitonin receptor	3.17	5.5	-5.04	0.0449
219508_at	GCNT3	glucosaminyl (N-acetyl) transferase 3, mucin type	3.36	5.22	-3.63	0.045
1558967_s_at	HCG18	HLA complex group 18 (non-protein coding)	3.53	5.18	-3.14	0.0451
219754_at	RBM41	RNA binding motif protein 41	5.9	7.39	-2.81	0.0453
236310_at	ZNF37BP	zinc finger protein 37B, pseudogene	5.41	6.85	-2.72	0.0453
226666_at	DAAM1	dishevelled associated activator of morphogenesis 1	8.12	9.33	-2.32	0.0454
1556186_s_at	EMC1	ER membrane protein complex subunit 1	6.62	7.59	-1.96	0.0455
203410_at	AP3M2	adaptor-related protein complex 3, mu 2 subunit	6.52	8.18	-3.15	0.0457
233835_at	LOC90246	uncharacterized LOC90246	4.24	7.67	-10.79	0.0457
211425_x_at	SSX4; SSX4B	synovial sarcoma, X breakpoint 4; synovial sarcoma, X breakpoint 4B	4.64	1.64	8.02	0.0457
219118_at	FKBP11	FK506 binding protein 11	10.32	9.41	1.89	0.046
1560881_a_at	LINC00112	long intergenic non-protein coding RNA 112	1.83	4.34	-5.7	0.046
221074_at	NCR2	natural cytotoxicity triggering receptor 2	3.63	5.47	-3.57	0.0462
203664_s_at	POLR2D	polymerase (RNA) II (DNA directed) polypeptide D	8.9	9.54	-1.55	0.0462
236007_at	AKAP10	A kinase (PRKA) anchor protein 10	4.35	6	-3.13	0.0464
244749_at	LOC101927204	uncharacterized LOC101927204	4.09	5.88	-3.46	0.0464
212216_at	PREPL	prolyl endopeptidase-like	7.59	8.75	-2.25	0.0466
215618_at	RSU1	Ras suppressor protein 1	4.81	6.51	-3.24	0.0466
214762_at	ATP6V1G2	ATPase, H+ transporting, lysosomal 13kDa, V1 subunit G2	5.65	3.96	3.23	0.0467
227191_at	ITFG1	integrin alpha FG-GAP repeat containing 1	6.06	7.16	-2.14	0.0468
226387_at	RSBN1L	round spermatid basic protein 1-like	7.98	8.8	-1.76	0.0468
237725_x_at	SMC5	structural maintenance of chromosomes 5	3.76	5.28	-2.87	0.047
239151_at	BMS1P5; LOC102724455	BMS1 ribosome biogenesis factor pseudogene 5; uncharacterized LOC102724455	6.98	3.71	9.61	0.0472
222039_at	KIF18B	kinesin family member 18B	6.71	8.99	-4.85	0.0472
219730_at	MED18	mediator complex subunit 18	1.27	4.26	-7.99	0.0473
217109_at	MUC4	mucin 4, cell surface associated	4.5	5.27	-1.71	0.0474
204208_at	RNGTT	RNA guanylyltransferase and 5'-phosphatase	6.86	7.6	-1.67	0.0474
209880_s_at	SELPLG	selectin P ligand	5.5	3.11	5.25	0.0474
218932_at	ZNHIT6	zinc finger, HIT-type containing 6	8.49	9.44	-1.93	0.0476
217940_s_at	CARKD	carbohydrate kinase domain containing	9.03	9.94	-1.88	0.0478
207646_s_at	CDY1; CDY1B; CDY2A; CDY2B	chromodomain protein, Y-linked, 1; chromodomain protein, Y-linked, 1B; chromodomain protein, Y-linked, 2A; chromodomain protein, Y-linked, 2B	2.61	4.84	-4.68	0.0478
209940_at	PARP3	poly(ADP-ribose) polymerase family member 3	7.59	6.86	1.67	0.0478
215678_at	LOC440792	proline dehydrogenase (oxidase) 1 pseudogene	4.17	5.89	-3.29	0.0479
1554780_a_at	PHTF2	putative homeodomain transcription factor 2	5.78	7.09	-2.48	0.0479
1559277_at	FLJ35700	uncharacterized protein FLJ35700	2.59	4.64	-4.14	0.048
1555450_a_at	NAA16	N(alpha)-acetyltransferase 16, NatA auxiliary subunit	5.11	6.92	-3.5	0.048
203532_x_at	CUL5	cullin 5	9.34	10.11	-1.71	0.0481
1559042_at	NDUFB6	NADH dehydrogenase (ubiquinone) 1 beta subcomplex, 6, 17kDa	4.61	1.46	8.89	0.0481
217086_at	CHRNB3	cholinergic receptor, nicotinic beta 3	2.15	4.7	-5.88	0.0483
232873_at	ZNF33A	zinc finger protein 33A	4.19	6.93	-6.66	0.0483
232695_at	KIF6	kinesin family member 6	4.73	5.35	-1.53	0.0484
212248_at	MTDH	metadherin	8.89	10.01	-2.16	0.0484
222846_at	RAB8B	RAB8B, member RAS oncogene family	8.66	9.59	-1.91	0.0485
222743_s_at	C11orf71	chromosome 11 open reading frame 71	8.32	7.39	1.9	0.0488
230712_at	LOC101930059; LOC102724250; NBPF1	uncharacterized LOC101930059; neuroblastoma breakpoint family member 1; neuroblastoma breakpoint family, member 1	6.56	5.19	2.59	0.0489
1552828_at	SNX18	sorting nexin 18	5.45	6.12	-1.6	0.0489
1553725_s_at	ZNF644	zinc finger protein 644	7.43	8.68	-2.38	0.0489
220693_at	CCDC82	coiled-coil domain containing 82	5.13	4.12	2.02	0.049
202081_at	IER2	immediate early response 2	13.6	12.86	1.67	0.0491
209234_at	KIF1B	kinesin family member 1B	9.1	9.9	-1.74	0.0491
208183_at	TACR3	tachykinin receptor 3	3.38	5.41	-4.07	0.0494
227463_at	ACE	angiotensin I converting enzyme	3.03	6.66	-12.38	0.0495
230626_at	TSPAN12	tetraspanin 12	8.34	7.13	2.31	0.0497
225814_at	XRN1	5'-3' exoribonuclease 1	10.13	11.21	-2.12	0.0497
1559635_at	CASC4	cancer susceptibility candidate 4	2.87	4.53	-3.14	0.0499
237054_at	ENPP5	ectonucleotide pyrophosphatase/phosphodiesterase 5 (putative)	0	1.53	-2.88	0.0499
207247_s_at	ZFX; ZFY	zinc finger protein, X-linked; zinc finger protein, Y-linked	9.78	10.37	-1.51	0.0499

## Sheet: Table S2
Table S2. List of DEGs at 4 hours post-treatment comparing EtOH control and RA-treated HPMECs.
ID	Gene Symbol	Description	RA_4 h Avg (log2)	Untreated_4 h Avg (log2)	Fold Change	P-val
202481_at	DHRS3	dehydrogenase/reductase (SDR family) member 3	12.98	9.75	9.33	5.43e-10
202859_x_at	CXCL8	chemokine (C-X-C motif) ligand 8	10.62	7.41	9.24	2.56e-07
208530_s_at	RARB	retinoic acid receptor, beta	9.82	6.02	13.88	1.11e-06
202599_s_at	NRIP1	nuclear receptor interacting protein 1	10.99	8.82	4.49	3.74e-06
230218_at	HIC1	hypermethylated in cancer 1	9.88	8.14	3.34	1.33e-05
216435_at	MAP2K5	mitogen-activated protein kinase kinase 5	0.09	5.34	-38.16	1.82e-05
208287_at	HCG9	HLA complex group 9 (non-protein coding)	3.46	6.55	-8.5	1.95e-05
235521_at	HOXA3	homeobox A3	11.01	8.54	5.54	3.2e-05
236348_at	TMEM176B	transmembrane protein 176B	2.26	6	-13.34	3.81e-05
236366_at	LOC102725228; LOC440149	uncharacterized LOC102725228; uncharacterized LOC440149	1.38	5.26	-14.72	4.22e-05
231492_at	LINC01523	long intergenic non-protein coding RNA 1523	1.48	4.73	-9.51	5.26e-05
204586_at	BSN	bassoon presynaptic cytomatrix protein	1.18	5.14	-15.58	5.43e-05
226021_at	RDH10	retinol dehydrogenase 10 (all-trans)	11.09	9.34	3.35	6.44e-05
239779_at	ATHL1	ATH1, acid trehalase-like 1 (yeast)	5.21	7.14	-3.81	0.0002
214921_at	KCNMA1	potassium channel, calcium activated large conductance subfamily M alpha, member 1	2.1	5.1	-8	0.0002
1559441_s_at	FLJ38576	uncharacterized LOC651430	1.45	3.82	-5.15	0.0002
219893_at	CCDC71	coiled-coil domain containing 71	4.14	6.2	-4.18	0.0003
237513_at	PRSS58	protease, serine, 58	1.94	4.98	-8.22	0.0003
213844_at	HOXA5	homeobox A5	11.06	8.88	4.53	0.0004
205290_s_at	BMP2	bone morphogenetic protein 2	11.4	9.57	3.57	0.0004
220318_at	EPN3	epsin 3	1.74	5.51	-13.59	0.0004
226822_at	STOX2	storkhead box 2	1.77	5.56	-13.84	0.0004
205289_at	BMP2	bone morphogenetic protein 2	11.51	8.94	5.92	0.0004
214147_at	MROH7	maestro heat-like repeat family member 7	2.9	4.8	-3.74	0.0004
203129_s_at	KIF5C	kinesin family member 5C	5.46	2.52	7.69	0.0005
234477_at	IGHA1; IGHV2-5; IGHV4-31	immunoglobulin heavy constant alpha 1; immunoglobulin heavy variable 2-5; immunoglobulin heavy variable 4-31	2.38	5.33	-7.74	0.0005
1554643_at	RGS11	regulator of G-protein signaling 11	1.08	5.26	-18.03	0.0005
239827_at	RGCC	regulator of cell cycle	6.37	2.32	16.6	0.0006
220362_at	PSORS1C1	psoriasis susceptibility 1 candidate 1	3.71	6.57	-7.26	0.0006
1570106_at	LOC101928139	uncharacterized LOC101928139	2.25	5.42	-9.04	0.0007
221684_s_at	NYX	nyctalopin	2.3	5.63	-10.03	0.0007
236749_at	MNT	MAX network transcriptional repressor	4.25	7.05	-6.97	0.0008
1555787_at	C11orf63	chromosome 11 open reading frame 63	1.2	3.96	-6.77	0.0008
1553789_a_at	C21orf58	chromosome 21 open reading frame 58	3.32	6.9	-12.01	0.0008
238201_at	LOC105376975	uncharacterized LOC105376975	2.19	6.2	-16.09	0.0008
222717_at	SDPR	serum deprivation response	10.44	9.29	2.22	0.0009
225166_at	ARHGAP18	Rho GTPase activating protein 18	8.47	7.21	2.4	0.0009
229521_at	CCDC71L	coiled-coil domain containing 71-like	9.29	10.55	-2.4	0.001
219768_at	VTCN1	V-set domain containing T cell activation inhibitor 1	1.05	3.92	-7.28	0.001
1555308_at	CARD14	caspase recruitment domain family, member 14	2.27	5.81	-11.65	0.001
1559651_at	CSNK1A1P1	casein kinase 1, alpha 1 pseudogene 1	4.53	0.58	15.41	0.0011
201830_s_at	NET1	neuroepithelial cell transforming 1	10.87	9.86	2.02	0.0011
235401_s_at	FCRLA	Fc receptor-like A	0.74	4.41	-12.76	0.0011
205331_s_at	REEP2	receptor accessory protein 2	4.21	7.11	-7.46	0.0011
1554418_s_at	SPOCK3	sparc/osteonectin, cwcv and kazal-like domains proteoglycan (testican) 3	1.14	4.15	-8.09	0.0012
241766_at	LOC100509303	uncharacterized LOC100509303	2.76	5.61	-7.17	0.0012
208226_x_at	ADAM22	ADAM metallopeptidase domain 22	0.39	3.68	-9.75	0.0012
233959_at	ADCY10P1	adenylate cyclase 10 (soluble) pseudogene 1	1.71	5.07	-10.29	0.0013
204462_s_at	SLC16A2	solute carrier family 16, member 2 (thyroid hormone transporter)	1.8	5.23	-10.76	0.0013
222904_s_at	TMC5	transmembrane channel like 5	1.3	5.84	-23.33	0.0013
226676_at	ZNF521	zinc finger protein 521	9.44	10.36	-1.9	0.0015
1560634_a_at	LOC105373876	uncharacterized LOC105373876	1	4.07	-8.39	0.0015
212975_at	DENND3	DENN/MADD domain containing 3	8.95	9.95	-2	0.0015
244297_at	FAM95C	family with sequence similarity 95, member C	5.59	1.72	14.64	0.0017
218517_at	JADE1	jade family PHD finger 1	8.94	10.07	-2.2	0.0017
1563208_s_at	IGF2BP2-AS1	IGF2BP2 antisense RNA 1	3.48	6.05	-5.92	0.0017
1570350_at	LOC100506403; LOC101928269; RUNX1	uncharacterized LOC100506403; uncharacterized LOC101928269; runt-related transcription factor 1	1.77	4.63	-7.28	0.0019
1558451_at	LOC285500	uncharacterized LOC285500	0.18	3.1	-7.56	0.0019
213478_at	KAZN	kazrin, periplakin interacting protein	3.09	6.23	-8.81	0.0019
233177_s_at	PNKD	paroxysmal nonkinesigenic dyskinesia	6.34	7.76	-2.67	0.002
215065_at	PHF8	PHD finger protein 8	1.6	4.65	-8.25	0.002
232330_at	COA1	cytochrome c oxidase assembly factor 1 homolog	2.53	6.41	-14.73	0.002
1557170_at	NEK8	NIMA-related kinase 8	2.21	5.33	-8.72	0.0021
1561509_at	BEND7	BEN domain containing 7	0.85	5.23	-20.8	0.0023
240573_at	LOC374443	C-type lectin domain family 2, member D pseudogene	5.14	1.23	15.11	0.0025
1554074_s_at	SLFNL1	schlafen like 1	2.85	5.34	-5.64	0.0025
238123_at	GABRQ	gamma-aminobutyric acid (GABA) A receptor, theta	6.12	3.5	6.18	0.0026
1553175_s_at	PDE5A	phosphodiesterase 5A, cGMP-specific	5.25	2.97	4.86	0.0026
230997_at	TTC21A	tetratricopeptide repeat domain 21A	5.61	6.47	-1.82	0.0026
1553510_s_at	RQCD1	RCD1 required for cell differentiation1 homolog (S. pombe)	11.49	10.61	1.85	0.0027
1562051_at	MIR646HG	MIR646 host gene	1.79	4.04	-4.74	0.0027
239882_at	LOC101928304	uncharacterized LOC101928304	4.8	7.07	-4.82	0.0027
230673_at	PKHD1L1	polycystic kidney and hepatic disease 1 (autosomal recessive)-like 1	1.81	5.71	-14.92	0.0027
206556_at	CLUL1	clusterin-like 1 (retinal)	3.29	4.91	-3.08	0.0028
44790_s_at	KIAA0226L	KIAA0226-like	6.84	3.71	8.77	0.0029
236270_at	NFATC4	nuclear factor of activated T-cells, cytoplasmic, calcineurin-dependent 4	3.85	5.52	-3.17	0.0029
1563241_at	LOC101927018	uncharacterized LOC101927018	5.91	7.67	-3.38	0.0029
203839_s_at	TNK2	tyrosine kinase, non-receptor, 2	8.82	10.16	-2.52	0.003
223877_at	C1QTNF7	C1q and tumor necrosis factor related protein 7	2.99	5.36	-5.14	0.003
1561327_at	LINC00242	long intergenic non-protein coding RNA 242	2.26	5.46	-9.18	0.003
243888_at	LOC105374030	uncharacterized LOC105374030	2.96	6.35	-10.43	0.003
1552775_at	GPRC6A	G protein-coupled receptor, class C, group 6, member A	2.71	4.79	-4.22	0.0032
1558381_a_at	TMEM147-AS1	TMEM147 antisense RNA 1	4.88	6.59	-3.28	0.0033
218266_s_at	NCS1	neuronal calcium sensor 1	8.79	7.11	3.21	0.0034
1559344_at	LOC101929064	uncharacterized LOC101929064	3.11	5.46	-5.11	0.0034
207167_at	CD101	CD101 molecule	2.62	5.25	-6.21	0.0035
239042_at	TSR1	TSR1, 20S rRNA accumulation, homolog (S. cerevisiae)	2.81	5.79	-7.87	0.0036
215883_at	CTNNA1	catenin (cadherin-associated protein), alpha 1	4.56	6.16	-3.04	0.0037
1565905_at	LOC400627	uncharacterized LOC400627	4.46	6.25	-3.46	0.0037
244662_at	MBD5	methyl-CpG binding domain protein 5	1.8	5.2	-10.54	0.0037
1555950_a_at	CD55	CD55 molecule, decay accelerating factor for complement (Cromer blood group)	13.56	12.87	1.62	0.0038
217332_at	CTAGE11P	CTAGE family, member 11, pseudogene	2.01	5.14	-8.75	0.0038
1557330_at	CASC23	cancer susceptibility candidate 23 (non-protein coding)	1.41	3.21	-3.49	0.0039
210020_x_at	CALML3	calmodulin-like 3	4.07	6.32	-4.74	0.004
210158_at	ERCC4	excision repair cross-complementation group 4	2.54	4.98	-5.42	0.0041
1566447_at	CD6	CD6 molecule	4.5	2.47	4.08	0.0043
1562671_s_at	LOC105370629	uncharacterized LOC105370629	0.21	3.17	-7.81	0.0043
219825_at	CYP26B1	cytochrome P450, family 26, subfamily B, polypeptide 1	8.12	4.86	9.58	0.0045
240199_x_at	ZNF345	zinc finger protein 345	4.74	6.57	-3.57	0.0045
217395_at	MT4	metallothionein 4	3.83	6.3	-5.54	0.0045
1554272_at	ERAP2	endoplasmic reticulum aminopeptidase 2	5.06	0.75	19.74	0.0047
238478_at	BNC2	basonuclin 2	8.41	6.58	3.55	0.0047
210764_s_at	CYR61	cysteine-rich, angiogenic inducer, 61	10.42	11.31	-1.87	0.0047
215860_at	SYT12	synaptotagmin XII	3.19	5.94	-6.73	0.0047
203558_at	CUL7	cullin 7	6.7	8.1	-2.64	0.0048
235561_at	TXNL1	thioredoxin-like 1	6.38	8.32	-3.82	0.005
201829_at	NET1	neuroepithelial cell transforming 1	12.92	12.1	1.77	0.0052
1564600_a_at	CCDC36	coiled-coil domain containing 36	4.26	6.02	-3.39	0.0052
1561038_at	ZNF81	zinc finger protein 81	3.22	5.36	-4.43	0.0053
242412_at	LOC101929255	uncharacterized LOC101929255	2.51	5.39	-7.37	0.0053
208065_at	ST8SIA3	ST8 alpha-N-acetyl-neuraminide alpha-2,8-sialyltransferase 3	0.1	3.86	-13.52	0.0053
207466_at	GAL	galanin/GMAP prepropeptide	4.36	5.81	-2.73	0.0054
211880_x_at	PCDHGA1	protocadherin gamma subfamily A, 1	6.52	7.2	-1.59	0.0055
232674_at	PFKFB4; UCN2	6-phosphofructo-2-kinase/fructose-2,6-biphosphatase 4; urocortin 2	3.07	4.67	-3.04	0.0056
1557788_a_at	LINC00476	long intergenic non-protein coding RNA 476	2.15	5.47	-10.02	0.0056
237758_at	LOC100505685	uncharacterized LOC100505685	0.85	4.43	-11.96	0.0056
1552378_s_at	RDH10	retinol dehydrogenase 10 (all-trans)	11.52	10.85	1.59	0.0057
213779_at	EMID1	EMI domain containing 1	5.19	6.99	-3.47	0.0057
217169_at	IGHA1; IGHG1; IGHM; IGHV3-38	immunoglobulin heavy constant alpha 1; immunoglobulin heavy constant gamma 1 (G1m marker); immunoglobulin heavy constant mu; immunoglobulin heavy variable 3-38 (non-functional)	0.77	2.61	-3.59	0.0057
220777_at	KIF13A	kinesin family member 13A	1.25	4.54	-9.84	0.0057
205466_s_at	HS3ST1	heparan sulfate (glucosamine) 3-O-sulfotransferase 1	9.47	8.08	2.62	0.0058
214311_at	ZFPL1	zinc finger protein-like 1	8.05	6.89	2.23	0.0058
230949_at	SLC23A3	solute carrier family 23, member 3	4.5	6.72	-4.64	0.0058
32062_at	LRRC14	leucine rich repeat containing 14	6.43	7.28	-1.8	0.0059
233523_at	BPIFB4	BPI fold containing family B, member 4	2.3	4.76	-5.51	0.006
237314_at	ENKUR	enkurin, TRPC channel interacting protein	1.86	6.09	-18.69	0.006
1553808_a_at	NKX2-3	NK2 homeobox 3	3.53	1.57	3.88	0.0062
228642_at	HOTAIRM1	HOXA transcript antisense RNA, myeloid-specific 1	11.02	9.29	3.33	0.0062
201703_s_at	PPP1R10	protein phosphatase 1, regulatory subunit 10	8.22	8.98	-1.7	0.0064
229845_at	MAPKAP1	mitogen-activated protein kinase associated protein 1	7.02	8.95	-3.81	0.0064
236088_at	NTNG1	netrin G1	0.88	3.33	-5.43	0.0064
230789_at	ZNF280B	zinc finger protein 280B	2.66	5.14	-5.57	0.0064
202531_at	IRF1	interferon regulatory factor 1	9.65	8.1	2.92	0.0066
221384_at	UCP1	uncoupling protein 1 (mitochondrial, proton carrier)	1.48	3.42	-3.83	0.0066
216877_at	LOC100505498	uncharacterized LOC100505498	3.69	5.9	-4.63	0.0067
1554319_at	RPS6KA5	ribosomal protein S6 kinase, 90kDa, polypeptide 5	0.36	5.07	-26.29	0.0068
230966_at	IL4I1	interleukin 4 induced 1	8.33	7.46	1.83	0.007
234284_at	GNG8	guanine nucleotide binding protein (G protein), gamma 8	3.97	5.62	-3.14	0.007
204800_s_at	DHRS12	dehydrogenase/reductase (SDR family) member 12	6.41	7.98	-2.98	0.007
207093_s_at	OMG	oligodendrocyte myelin glycoprotein	1.56	5.21	-12.52	0.007
222934_s_at	CLEC4E	C-type lectin domain family 4, member E	3.82	4.89	-2.1	0.0071
208009_s_at	ARHGEF16	Rho guanine nucleotide exchange factor 16	2.76	6.18	-10.7	0.0072
209883_at	COLGALT2	collagen beta(1-O)galactosyltransferase 2	1.89	4.75	-7.25	0.0072
215500_at	SNX29	sorting nexin 29	3.77	6.06	-4.9	0.0073
214457_at	HOXA2	homeobox A2	10.4	8.64	3.39	0.0075
213560_at	GADD45B	growth arrest and DNA-damage-inducible, beta	9.98	10.66	-1.61	0.0075
216906_at	ST14	suppression of tumorigenicity 14 (colon carcinoma)	4.54	6.4	-3.64	0.0075
1558574_at	LOC100508631	uncharacterized LOC100508631	0.07	2.26	-4.57	0.0075
1559587_at	SYMPK	symplekin	2.99	6.61	-12.32	0.0077
240512_x_at	KCTD4	potassium channel tetramerization domain containing 4	1.07	4.93	-14.51	0.0078
232650_at	C12orf65	chromosome 12 open reading frame 65	2.04	4.52	-5.58	0.0079
232096_x_at	FOXP1-IT1	FOXP1 intronic transcript 1	2.4	5.6	-9.19	0.0079
213994_s_at	SPON1	spondin 1, extracellular matrix protein	1.2	5.15	-15.4	0.0079
1552809_at	RFX4	regulatory factor X, 4 (influences HLA class II expression)	1.23	4.01	-6.85	0.0084
210693_at	SPPL2B	signal peptide peptidase like 2B	2.09	3.78	-3.23	0.0085
1554331_a_at	LRRC18	leucine rich repeat containing 18	2.25	4.21	-3.9	0.0085
224221_s_at	VAV3	vav 3 guanine nucleotide exchange factor	5.42	7.9	-5.56	0.0086
227128_s_at	TACSTD2	tumor-associated calcium signal transducer 2	7.42	4.14	9.74	0.0087
203541_s_at	KLF9	Kruppel-like factor 9	6.02	3.14	7.35	0.0087
221576_at	GDF15	growth differentiation factor 15	10.07	9.23	1.79	0.0087
231066_s_at	CLCN4	chloride channel, voltage-sensitive 4	1.96	5.13	-8.95	0.0087
220469_at	COPE	coatomer protein complex subunit epsilon	2.32	5.62	-9.88	0.0087
201860_s_at	PLAT	plasminogen activator, tissue	11.85	10.92	1.9	0.0088
220435_at	SLC30A10	solute carrier family 30, member 10	3.12	0.39	6.65	0.0088
1562598_at	DLG5-AS1	DLG5 antisense RNA 1	0.73	4.61	-14.67	0.0091
210224_at	MR1	major histocompatibility complex, class I-related	4.47	2.83	3.13	0.0092
236360_at	LINC00982	long intergenic non-protein coding RNA 982	2.22	5.09	-7.29	0.0092
1555370_a_at	CAMTA1	calmodulin binding transcription activator 1	5.89	7.6	-3.28	0.0099
220049_s_at	PDCD1LG2	programmed cell death 1 ligand 2	5.98	4.88	2.15	0.0101
222052_at	C19orf54	chromosome 19 open reading frame 54	8.49	9.79	-2.47	0.0103
1562116_at	LINC01494	long intergenic non-protein coding RNA 1494	4.22	2.28	3.84	0.0104
221577_x_at	GDF15	growth differentiation factor 15	12.01	11.26	1.68	0.0104
216174_at	HCRP1	hepatocellular carcinoma-related HCRP1	3.58	6.19	-6.11	0.0104
236637_at	PRH1	proline-rich protein HaeIII subfamily 1	0.07	4.08	-16.07	0.0104
205907_s_at	OMD	osteomodulin	0.98	4.63	-12.59	0.0107
232733_s_at	COL20A1	collagen, type XX, alpha 1	4.78	6.38	-3.03	0.0109
1555206_at	LOC100287210	uncharacterized LOC100287210	4.91	3.06	3.61	0.011
221556_at	CDC14B	cell division cycle 14B	6.48	7.61	-2.18	0.011
223995_at	SLC12A9	solute carrier family 12, member 9	4.43	7.08	-6.26	0.011
238981_at	TMEM223	transmembrane protein 223	2.52	5.79	-9.63	0.011
1554953_a_at	TSPEAR-AS2	TSPEAR antisense RNA 2	2.34	5.29	-7.72	0.0112
1553799_at	FAM227B	family with sequence similarity 227, member B	0.03	4.87	-28.67	0.0112
209169_at	GPM6B	glycoprotein M6B	1.86	4.54	-6.39	0.0113
229218_at	COL1A2	collagen, type I, alpha 2	0.76	3.66	-7.47	0.0114
232080_at	HECW2	HECT, C2 and WW domain containing E3 ubiquitin protein ligase 2	10.31	11.87	-2.94	0.0116
226471_at	GGT7	gamma-glutamyltransferase 7	1.72	4.48	-6.75	0.0116
224552_s_at	KCNK4	potassium channel, two pore domain subfamily K, member 4	5.47	6.4	-1.9	0.0117
1560485_at	HIVEP1	human immunodeficiency virus type I enhancer binding protein 1	2.42	4.6	-4.54	0.0119
232560_at	UROS	uroporphyrinogen III synthase	3.99	6.38	-5.26	0.0119
243095_at	LOC105371079	uncharacterized LOC105371079	4.96	6.55	-3.02	0.012
224062_x_at	KLK4	kallikrein related peptidase 4	2.28	5.55	-9.63	0.012
211054_at	INVS	inversin	1.94	4.49	-5.85	0.0121
1561942_x_at	ERVK13-1	endogenous retrovirus group K13, member 1	3.65	6.3	-6.31	0.0124
230876_at	ZNF883	zinc finger protein 883	1.68	4.47	-6.9	0.0124
231497_at	ZBTB20-AS1	ZBTB20 antisense RNA 1	4.12	5.82	-3.24	0.0125
1555606_a_at	GDPD1	glycerophosphodiester phosphodiesterase domain containing 1	4.5	5.46	-1.94	0.0126
203125_x_at	SLC11A2	solute carrier family 11 (proton-coupled divalent metal ion transporter), member 2	7.68	8.76	-2.11	0.0126
201452_at	RHEB	Ras homolog enriched in brain	5.73	4.11	3.07	0.0128
217160_at	TSPY1	testis specific protein, Y-linked 1	1.42	3.33	-3.77	0.0128
210311_at	FGF5	fibroblast growth factor 5	8.62	9.77	-2.22	0.0129
236190_at	LOC102723692	uncharacterized LOC102723692	2.15	3.47	-2.5	0.0129
237679_at	TRIM66	tripartite motif containing 66	2.04	4	-3.9	0.0129
1555053_at	SYT9	synaptotagmin IX	3.38	5.44	-4.17	0.0129
217589_at	RAB40A	RAB40A, member RAS oncogene family	2.29	5.1	-7.06	0.0129
227467_at	RDH10	retinol dehydrogenase 10 (all-trans)	11.27	10.25	2.03	0.013
219967_at	MRM1	mitochondrial rRNA methyltransferase 1	4.22	7.21	-7.94	0.013
236313_at	CDKN2B	cyclin-dependent kinase inhibitor 2B (p15, inhibits CDK4)	9.2	8.37	1.78	0.0131
1553013_at	CNTNAP5	contactin associated protein-like 5	1.89	4.36	-5.53	0.0132
232732_at	LOC100652999	uncharacterized LOC100652999	6.33	7.39	-2.09	0.0134
215175_at	PCNX	pecanex homolog (Drosophila)	4.5	5.98	-2.79	0.0134
238036_at	SHE	Src homology 2 domain containing E	5.36	7.15	-3.46	0.0134
220015_at	CASZ1	castor zinc finger 1	4.65	6.51	-3.64	0.0135
1555298_a_at	VWA3B	von Willebrand factor A domain containing 3B	4.99	5.89	-1.88	0.0137
235768_at	SH3RF2	SH3 domain containing ring finger 2	2.64	5.49	-7.24	0.0137
217684_at	TYMS	thymidylate synthetase	2.39	6.51	-17.38	0.0137
1569078_at	LOC100294362	uncharacterized LOC100294362	4.26	5.23	-1.97	0.0138
234292_s_at	ZKSCAN7	zinc finger with KRAB and SCAN domains 7	5.33	6.57	-2.37	0.0138
1556768_at	LINC00930	long intergenic non-protein coding RNA 930	4	5.74	-3.35	0.0138
1561728_a_at	LINC00642	long intergenic non-protein coding RNA 642	2.2	4.61	-5.32	0.014
228892_at	SH3RF2	SH3 domain containing ring finger 2	6.07	7.14	-2.1	0.0141
231501_at	LOC105375773	uncharacterized LOC105375773	3.84	4.95	-2.17	0.0141
1562257_x_at	NLRP1	NLR family, pyrin domain containing 1	2.99	4.7	-3.27	0.0142
1554722_at	TRPM3	transient receptor potential cation channel, subfamily M, member 3	1.06	3.54	-5.58	0.0142
219243_at	GIMAP4	GTPase, IMAP family member 4	9.88	9.02	1.81	0.0143
1555944_at	FAM120A	family with sequence similarity 120A	4.01	5.62	-3.05	0.0143
214907_at	CEACAM21	carcinoembryonic antigen-related cell adhesion molecule 21	3.25	5.58	-5.04	0.0144
1562524_at	THSD4-AS1	THSD4 antisense RNA 1	1.14	4.59	-10.93	0.0144
211901_s_at	PDE4A	phosphodiesterase 4A, cAMP-specific	5.93	7.12	-2.29	0.0145
230742_at	RBM5	RNA binding motif protein 5	6.04	7.6	-2.94	0.0145
204589_at	NUAK1	NUAK family, SNF1-like kinase, 1	10.14	10.79	-1.56	0.0146
244128_x_at	GLIS1	GLIS family zinc finger 1	1.86	4.15	-4.92	0.0146
1557762_at	LOC105377458	uncharacterized LOC105377458	0.93	3.54	-6.1	0.0146
227195_at	ZNF503	zinc finger protein 503	11.02	10.35	1.59	0.0148
213314_at	LINC01590; SMIM8	long intergenic non-protein coding RNA 1590; small integral membrane protein 8	5.89	7.37	-2.79	0.0148
1557528_at	STRADA	STE20-related kinase adaptor alpha	3.2	5.51	-4.96	0.0148
1554677_s_at	CMTM4	CKLF-like MARVEL transmembrane domain containing 4	4.66	6.87	-4.63	0.015
227099_s_at	C11orf96	chromosome 11 open reading frame 96	10.09	8.79	2.46	0.0153
228100_at	PIFO	primary cilia formation	1.69	4.08	-5.25	0.0153
216866_s_at	COL14A1	collagen, type XIV, alpha 1	5.49	3.57	3.79	0.0154
208436_s_at	IRF7	interferon regulatory factor 7	8.97	7.81	2.23	0.0154
215418_at	PARVA	parvin, alpha	5.6	6.66	-2.08	0.0154
1556328_at	PCDH10	protocadherin 10	2.84	5.47	-6.18	0.0154
1562005_at	RIN3	Ras and Rab interactor 3	1.24	3.88	-6.22	0.0154
218839_at	HEY1	hes-related family bHLH transcription factor with YRPW motif 1	12.78	13.42	-1.56	0.0155
235179_at	ZNF641	zinc finger protein 641	2.56	5.29	-6.63	0.0155
207385_at	TFDP3	transcription factor Dp family, member 3	2.48	5.5	-8.13	0.0157
225531_at	CABLES1	Cdk5 and Abl enzyme substrate 1	9.25	8.47	1.72	0.0158
226757_at	IFIT2	interferon-induced protein with tetratricopeptide repeats 2	8.98	7.36	3.08	0.0159
237048_at	LOC105373383	uncharacterized LOC105373383	5.82	2.75	8.43	0.016
203863_at	ACTN2	actinin, alpha 2	1.02	3.78	-6.8	0.0163
233308_at	COPB1	coatomer protein complex subunit beta 1	1.64	4.83	-9.13	0.0163
208450_at	LGALS2	lectin, galactoside-binding, soluble, 2	5.23	6.28	-2.06	0.0166
235687_at	ZNF626	zinc finger protein 626	4.98	6.52	-2.91	0.0166
235854_x_at	ROCK1	Rho-associated, coiled-coil containing protein kinase 1	4.31	2.41	3.75	0.0167
204188_s_at	RARG	retinoic acid receptor, gamma	8.78	7.57	2.32	0.0167
221129_at	FAM215A	family with sequence similarity 215, member A (non-protein coding)	4.31	6.04	-3.31	0.0167
1566473_a_at	LOC100996506	uncharacterized LOC100996506	5.23	6.97	-3.34	0.0167
213425_at	WNT5A	wingless-type MMTV integration site family, member 5A	0.85	3.88	-8.18	0.0167
1555003_at	RBL1	retinoblastoma-like 1	0.48	4.71	-18.76	0.0167
1569375_at	LOC101929964	uncharacterized LOC101929964	2.87	1.63	2.36	0.0169
226213_at	ERBB3	erb-b2 receptor tyrosine kinase 3	4.57	1.33	9.49	0.017
220462_at	CSRNP3	cysteine-serine-rich nuclear protein 3	1.47	4.12	-6.31	0.017
228504_at	SCN7A	sodium channel, voltage gated, type VII alpha subunit	1.6	4.2	-6.07	0.0173
211258_s_at	TGFA	transforming growth factor alpha	6.16	3.97	4.56	0.0176
223912_s_at	CLN8	ceroid-lipofuscinosis, neuronal 8	6.81	7.68	-1.83	0.0176
219954_s_at	GBA3	glucosidase, beta, acid 3 (gene/pseudogene)	3.89	4.78	-1.85	0.0176
228550_at	RTN4R	reticulon 4 receptor	5.37	3.09	4.85	0.0179
211610_at	KLF6	Kruppel-like factor 6	5.2	6.15	-1.92	0.018
1564211_at	LINC01550	long intergenic non-protein coding RNA 1550	4.75	5.66	-1.87	0.0181
215105_at	N4BP2L2-IT2	N4BPL2 intronic transcript 2	3.67	6.56	-7.4	0.0181
219541_at	LIME1	Lck interacting transmembrane adaptor 1	4.62	6.47	-3.61	0.0182
214980_at	UBE3A	ubiquitin protein ligase E3A	3.45	5.52	-4.21	0.0182
220394_at	FGF20	fibroblast growth factor 20	3.53	2	2.88	0.0184
210549_s_at	CCL23	chemokine (C-C motif) ligand 23	1.68	4.87	-9.12	0.0188
224409_s_at	TSSK6	testis-specific serine kinase 6	1.83	3.14	-2.46	0.019
1553722_s_at	RNF152	ring finger protein 152	8.26	6.88	2.61	0.0191
226905_at	FAM101B	family with sequence similarity 101, member B	12.74	12.02	1.65	0.0191
226933_s_at	ID4	inhibitor of DNA binding 4, dominant negative helix-loop-helix protein	0.66	5.56	-29.91	0.0191
225418_at	PVRL2	poliovirus receptor-related 2 (herpesvirus entry mediator B)	8.09	8.91	-1.76	0.0192
213382_at	MST1L	macrophage stimulating 1-like	1.51	3.81	-4.92	0.0192
1552834_at	B3GNT6	UDP-GlcNAc:betaGal beta-1,3-N-acetylglucosaminyltransferase 6	4.75	6.67	-3.79	0.0193
243862_at	RASEF	RAS and EF-hand domain containing	0.05	3.09	-8.25	0.0193
1569693_at	BTBD8	BTB (POZ) domain containing 8	2.71	5.76	-8.28	0.0193
209830_s_at	SLC9A3R2	solute carrier family 9, subfamily A (NHE3, cation proton antiporter 3), member 3 regulator 2	10.06	11.01	-1.94	0.0194
1560174_at	SPAG16	sperm associated antigen 16	2.56	5.04	-5.61	0.0194
217109_at	MUC4	mucin 4, cell surface associated	3.58	4.75	-2.25	0.0195
229306_at	C2CD4B	C2 calcium-dependent domain containing 4B	7.15	7.77	-1.54	0.0196
228428_at	FAM102A	family with sequence similarity 102, member A	10.55	11.73	-2.27	0.0196
228429_x_at	KIF9	kinesin family member 9	11.19	9.7	2.81	0.0197
240674_at	JARID2	jumonji, AT rich interactive domain 2	3.34	5.24	-3.74	0.0199
1562223_at	LOC642426	uncharacterized LOC642426	3.72	0.56	8.93	0.0201
205938_at	PPM1E	protein phosphatase, Mg2+/Mn2+ dependent, 1E	0.79	4.52	-13.32	0.0201
235518_at	SLC8A1	solute carrier family 8 (sodium/calcium exchanger), member 1	2.54	5.36	-7.03	0.0203
218697_at	NCKIPSD	NCK interacting protein with SH3 domain	6.93	8.06	-2.18	0.0204
201821_s_at	TIMM17A	translocase of inner mitochondrial membrane 17 homolog A (yeast)	11.69	11.1	1.5	0.0205
1569073_x_at	SMARCA4	SWI/SNF related, matrix associated, actin dependent regulator of chromatin, subfamily a, member 4	4.85	6.79	-3.86	0.0205
236976_at	FANCA	Fanconi anemia complementation group A	1.44	4.85	-10.65	0.0205
211092_s_at	NF2	neurofibromin 2 (merlin)	8.97	9.71	-1.67	0.0206
1563207_at	IGF2BP2-AS1	IGF2BP2 antisense RNA 1	2.74	4.89	-4.45	0.0209
1561348_at	LOC339874	uncharacterized LOC339874	3.49	6.03	-5.81	0.0209
210882_s_at	TRO	trophinin	5.14	5.98	-1.79	0.021
239787_at	KCTD4	potassium channel tetramerization domain containing 4	3.16	5.03	-3.64	0.0212
237154_at	LOC101930114	uncharacterized LOC101930114	6.32	3.9	5.35	0.0213
239349_at	C1QTNF7	C1q and tumor necrosis factor related protein 7	2.98	4.35	-2.59	0.0216
205890_s_at	GABBR1; UBD	gamma-aminobutyric acid (GABA) B receptor, 1; ubiquitin D	10.77	9.87	1.87	0.0217
204578_at	PPIP5K1	diphosphoinositol pentakisphosphate kinase 1	6.62	7.39	-1.71	0.0217
1570315_at	HCCAT5	hepatocellular carcinoma associated transcript 5 (non-protein coding)	3.71	6.06	-5.11	0.0218
1560818_at	LINC00944	long intergenic non-protein coding RNA 944	2.1	4.93	-7.11	0.0218
243459_x_at	CDK14	cyclin-dependent kinase 14	4.51	6.21	-3.24	0.0219
1553711_a_at	FAM218A	family with sequence similarity 218, member A	2.91	4.9	-3.95	0.0219
227985_at	LOC100506098	uncharacterized LOC100506098	3.34	1.99	2.54	0.022
241277_x_at	ZNF837	zinc finger protein 837	6.61	3.38	9.34	0.0221
208586_s_at	LOC105369273; SSX4; SSX4B	protein SSX4-like; synovial sarcoma, X breakpoint 4; synovial sarcoma, X breakpoint 4B	1.44	4.36	-7.57	0.0223
203052_at	C2	complement component 2	2.49	3.48	-1.98	0.0227
238851_at	ANKRD13A	ankyrin repeat domain 13A	2.96	5.72	-6.81	0.0237
241715_x_at	ACPT	acid phosphatase, testicular	7.61	8.36	-1.69	0.0238
206681_x_at	GP2	glycoprotein 2 (zymogen granule membrane)	2.53	3.96	-2.7	0.0238
203703_s_at	TTLL4	tubulin tyrosine ligase-like family member 4	5.73	7.32	-3.01	0.0238
1554580_a_at	WWP2	WW domain containing E3 ubiquitin protein ligase 2	2.89	5.31	-5.37	0.0239
1553460_at	C2orf61	chromosome 2 open reading frame 61	1.64	4.55	-7.52	0.024
1569813_at	STRN	striatin, calmodulin binding protein	1.66	5.16	-11.32	0.024
206803_at	PDYN	prodynorphin	1.86	3.88	-4.05	0.0241
235582_at	E2F2	E2F transcription factor 2	5.53	6.23	-1.62	0.0242
1559256_at	MAGI1	membrane associated guanylate kinase, WW and PDZ domain containing 1	1.34	4.29	-7.73	0.0242
1559298_a_at	SPATA41	spermatogenesis associated 41 (non-protein coding)	5.09	3.38	3.26	0.0243
207048_at	SLC6A11	solute carrier family 6 (neurotransmitter transporter), member 11	3.6	5.16	-2.95	0.0244
1553084_at	STARD6	StAR-related lipid transfer domain containing 6	4.48	2.6	3.67	0.0245
206543_at	SMARCA2	SWI/SNF related, matrix associated, actin dependent regulator of chromatin, subfamily a, member 2	10.09	9.25	1.79	0.0246
221002_s_at	TSPAN14	tetraspanin 14	12.21	11.58	1.55	0.0246
236705_at	TMEM196	transmembrane protein 196	3.41	1.33	4.22	0.0247
228206_at	HS3ST4	heparan sulfate (glucosamine) 3-O-sulfotransferase 4	3.61	2.04	2.96	0.0248
204691_x_at	PLA2G6	phospholipase A2, group VI (cytosolic, calcium-independent)	4.33	5.62	-2.44	0.0249
230913_at	ABCG1	ATP binding cassette subfamily G member 1	8.67	7.31	2.56	0.0252
1557219_at	LVCAT1	liver cancer-associated transcript 1	0.65	3.48	-7.09	0.0252
1554855_at	PARK2	parkin RBR E3 ubiquitin protein ligase	4.96	0.78	18.14	0.0254
1556467_at	ZNF80	zinc finger protein 80	3.79	0.51	9.69	0.0254
206913_at	BAAT	bile acid-CoA:amino acid N-acyltransferase	4.77	2.52	4.76	0.0258
207951_at	CSN2	casein beta	0.47	4.07	-12.18	0.0258
207757_at	ZFP2	ZFP2 zinc finger protein	0.35	2.59	-4.74	0.0259
214154_s_at	PKP2	plakophilin 2	3.16	6.32	-8.92	0.0259
229868_s_at	GDF15	growth differentiation factor 15	12.54	11.82	1.65	0.026
232415_at	PCDHB13	protocadherin beta 13	2.35	4.69	-5.08	0.0262
223959_at	DNAL1	dynein, axonemal, light chain 1	4.95	6.63	-3.2	0.0263
1561616_a_at	DNAH6	dynein, axonemal, heavy chain 6	4.98	2.22	6.75	0.0265
241625_at	LOC389834	ankyrin repeat domain 57 pseudogene	4.49	3.15	2.54	0.0265
234633_at	KRTAP4-11	keratin associated protein 4-11	3.51	5.02	-2.85	0.0265
211387_x_at	RNGTT	RNA guanylyltransferase and 5'-phosphatase	6.19	6.87	-1.61	0.027
218736_s_at	PALMD	palmdelphin	10.75	11.4	-1.57	0.0271
210066_s_at	AQP4	aquaporin 4	0	2.69	-6.45	0.0271
242055_at	PSMG4	proteasome (prosome, macropain) assembly chaperone 4	3.78	6.66	-7.35	0.0271
212935_at	MCF2L	MCF.2 cell line derived transforming sequence like	0.83	3.27	-5.42	0.0272
1555989_at	DAAM1	dishevelled associated activator of morphogenesis 1	9.25	10.26	-2	0.0273
221279_at	GDAP1	ganglioside induced differentiation associated protein 1	4.49	6.27	-3.44	0.0274
244173_at	MIS18BP1	MIS18 binding protein 1	1.12	3.63	-5.71	0.0274
1558745_at	SNX29	sorting nexin 29	0.94	3.3	-5.15	0.0275
227480_at	SUSD2	sushi domain containing 2	1.47	3.26	-3.45	0.0276
206800_at	MTHFR	methylenetetrahydrofolate reductase (NAD(P)H)	6.73	7.8	-2.09	0.0277
205468_s_at	IRF5	interferon regulatory factor 5	4.03	5.88	-3.61	0.0277
216330_s_at	POU6F1	POU class 6 homeobox 1	2.05	5.78	-13.23	0.0277
203295_s_at	ATP1A2	ATPase, Na+/K+ transporting, alpha 2 polypeptide	2.15	4.15	-4	0.0278
1553710_at	FAM218A	family with sequence similarity 218, member A	0.81	3.04	-4.7	0.0278
1554910_at	PRKD3	protein kinase D3	2.45	5.05	-6.07	0.0278
240490_at	LOC101929592	uncharacterized LOC101929592	0.65	3.86	-9.28	0.0281
236583_at	GIMAP1	GTPase, IMAP family member 1	4.45	5.6	-2.21	0.0282
239909_at	ADAMTSL1	ADAMTS like 1	7.61	9.47	-3.62	0.0282
1561502_x_at	CTU2	cytosolic thiouridylase subunit 2 homolog (S. pombe)	5.39	6.98	-3.01	0.0283
243077_at	FLJ16734	uncharacterized LOC641928	2.85	5.58	-6.62	0.0285
202711_at	EFNB1	ephrin-B1	8.87	8.11	1.7	0.0286
210547_x_at	ICA1	islet cell autoantigen 1	9.09	9.82	-1.66	0.0286
238083_at	PARP10	poly(ADP-ribose) polymerase family member 10	4.55	6.02	-2.77	0.0286
1554262_s_at	KLHL29	kelch-like family member 29	3.75	5.34	-3	0.0286
228503_at	RPS6KA6	ribosomal protein S6 kinase, 90kDa, polypeptide 6	2.11	3.91	-3.48	0.0288
220231_at	PPP1R17	protein phosphatase 1, regulatory subunit 17	1.64	4.72	-8.48	0.029
222220_s_at	TSNAXIP1	translin-associated factor X interacting protein 1	5.97	6.94	-1.96	0.0291
240087_at	LOC101927837	uncharacterized LOC101927837	5.25	2.93	5	0.0292
211827_s_at	KCND3	potassium channel, voltage gated Shal related subfamily D, member 3	5.05	3.01	4.1	0.0292
209317_at	POLR1C	polymerase (RNA) I polypeptide C	11.21	10.29	1.89	0.0292
240052_at	ITPR1	inositol 1,4,5-trisphosphate receptor, type 1	0.67	4.84	-18	0.0293
228599_at	MS4A1	membrane-spanning 4-domains, subfamily A, member 1	3.89	1.72	4.5	0.0296
229812_at	USP48	ubiquitin specific peptidase 48	7.49	8.27	-1.73	0.0299
1563542_a_at	SCML4	sex comb on midleg-like 4 (Drosophila)	4.23	5.78	-2.93	0.0299
205885_s_at	ITGA4	integrin alpha 4	9.54	8.88	1.57	0.03
223495_at	CCDC8	coiled-coil domain containing 8	2.95	5.45	-5.65	0.0301
202912_at	ADM	adrenomedullin	12.18	11.51	1.58	0.0303
229191_at	TBCD	tubulin folding cofactor D	4.42	5.89	-2.76	0.0307
214145_s_at	SPTB	spectrin, beta, erythrocytic	2.98	5.09	-4.31	0.0308
1566253_at	SH3GL1P1	SH3-domain GRB2-like 1 pseudogene 1	1.2	4.53	-10.06	0.0309
1568926_x_at	MYLK3	myosin light chain kinase 3	2.54	5.03	-5.61	0.0314
233516_s_at	SPAG17	sperm associated antigen 17	1.71	4.56	-7.21	0.0314
206539_s_at	CYP4F12	cytochrome P450, family 4, subfamily F, polypeptide 12	1.79	4.1	-4.97	0.0316
214839_at	LINC00599	long intergenic non-protein coding RNA 599	4.7	2.62	4.22	0.0317
218469_at	GREM1	gremlin 1, DAN family BMP antagonist	5.72	6.96	-2.37	0.0318
216963_s_at	GAP43	growth associated protein 43	2.49	5.05	-5.9	0.032
206771_at	UPK3A	uroplakin 3A	4.95	3.03	3.79	0.0321
237842_at	MAP7D3	MAP7 domain containing 3	3.14	6.12	-7.87	0.0322
233681_at	KRTAP3-3	keratin associated protein 3-3	2.96	0.47	5.59	0.0323
205766_at	TCAP	titin-cap	3.67	5.68	-4.03	0.0324
206248_at	PRKCE	protein kinase C, epsilon	7.92	7.19	1.67	0.0325
231629_x_at	KLK3	kallikrein related peptidase 3	6.75	7.42	-1.6	0.0326
235965_at	BHLHA15	basic helix-loop-helix family, member a15	2.04	4.65	-6.1	0.0326
1568812_at	LOC100507140	uncharacterized LOC100507140	4.07	3.23	1.78	0.0327
212086_x_at	LMNA	lamin A/C	10.51	11.1	-1.5	0.0327
1559000_at	PRR26	proline rich 26	4.54	6.26	-3.31	0.0327
1559133_at	ZNF546	zinc finger protein 546	1.08	4.58	-11.29	0.0329
215454_x_at	SFTPC	surfactant protein C	4.44	6.43	-3.99	0.033
1555300_a_at	MED12L	mediator complex subunit 12 like	1.03	3.51	-5.58	0.0332
1561688_at	LOC101929662	uncharacterized LOC101929662	1.31	3.49	-4.53	0.0343
37892_at	COL11A1	collagen, type XI, alpha 1	0.3	2.76	-5.51	0.0343
215237_at	DOCK9	dedicator of cytokinesis 9	7.2	6.04	2.23	0.0345
243235_at	LOC105375282	uncharacterized LOC105375282	1.63	2.45	-1.76	0.0346
1553901_x_at	ZNF486	zinc finger protein 486	5.81	6.81	-1.99	0.0346
1564591_a_at	TMC1	transmembrane channel like 1	2.38	3.52	-2.21	0.0347
1569555_at	GDA	guanine deaminase	0.49	4.43	-15.44	0.0347
241601_at	WIPF3	WAS/WASL interacting protein family, member 3	4.19	5.45	-2.4	0.0348
205786_s_at	ITGAM	integrin, alpha M (complement component 3 receptor 3 subunit)	5.13	2.77	5.14	0.035
200635_s_at	PTPRF	protein tyrosine phosphatase, receptor type, F	9.48	10.2	-1.65	0.035
1558199_at	FN1	fibronectin 1	7.61	8.95	-2.54	0.035
1562938_at	FAHD2CP	fumarylacetoacetate hydrolase domain containing 2C, pseudogene	1.55	5.31	-13.54	0.0351
231706_s_at	EVX1	even-skipped homeobox 1	5.11	3.07	4.12	0.0352
214768_x_at	IGKV2-28; IGKV2D-28	immunoglobulin kappa variable 2-28; immunoglobulin kappa variable 2D-28	5.63	6.38	-1.68	0.0352
1552903_at	B4GALNT2	beta-1,4-N-acetyl-galactosaminyl transferase 2	4.25	5.43	-2.28	0.0352
234539_at	ADARB1	adenosine deaminase, RNA-specific, B1	2.35	5.95	-12.15	0.0352
234073_at	SDK2	sidekick cell adhesion molecule 2	0.95	3.16	-4.64	0.0354
244829_at	LINC00518	long intergenic non-protein coding RNA 518	0.44	2.56	-4.35	0.0355
216057_at	RAB3GAP2	RAB3 GTPase activating protein subunit 2 (non-catalytic)	5.29	6.26	-1.96	0.0356
240012_at	LOC101928014	uncharacterized LOC101928014	4.52	1.96	5.93	0.0358
204867_at	GCHFR	GTP cyclohydrolase I feedback regulator	8.02	6.73	2.44	0.0361
1556167_at	MROH2A	maestro heat-like repeat family member 2A	0.45	2.99	-5.81	0.0361
1553359_at	FBXL18	F-box and leucine-rich repeat protein 18	5.49	6.63	-2.21	0.0362
208378_x_at	FGF5	fibroblast growth factor 5	7.22	8.17	-1.93	0.0364
222776_at	MAGOHB	mago homolog B, exon junction complex core component	3.99	5.79	-3.49	0.0364
1559980_at	ZNF7	zinc finger protein 7	2.35	4.68	-5.02	0.0366
229913_at	C7orf61	chromosome 7 open reading frame 61	8.23	7.51	1.65	0.0367
1568617_a_at	CAMSAP3	calmodulin regulated spectrin-associated protein family, member 3	5.34	5.97	-1.55	0.037
1565834_a_at	KANK1	KN motif and ankyrin repeat domains 1	3.57	1.1	5.55	0.0371
1570251_at	HECTD1	HECT domain containing E3 ubiquitin protein ligase 1	2.56	5.71	-8.89	0.0372
231463_at	CNTD1	cyclin N-terminal domain containing 1	2.61	6.12	-11.36	0.0375
230643_at	WNT9A	wingless-type MMTV integration site family, member 9A	7.86	6.84	2.02	0.0376
241328_at	ZMAT1	zinc finger, matrin-type 1	2.88	4.71	-3.54	0.0377
211425_x_at	SSX4; SSX4B	synovial sarcoma, X breakpoint 4; synovial sarcoma, X breakpoint 4B	4.39	5.23	-1.78	0.0378
226677_at	ZNF521	zinc finger protein 521	9.62	10.42	-1.75	0.0379
1568780_at	LOC729732	uncharacterized LOC729732	5.55	2.53	8.13	0.0382
222108_at	AMIGO2	adhesion molecule with Ig-like domain 2	8.23	9.19	-1.95	0.0383
238576_at	MOCOS	molybdenum cofactor sulfurase	2.1	4.38	-4.85	0.0383
1560407_at	MARK1	MAP/microtubule affinity-regulating kinase 1	4.42	5.49	-2.1	0.0384
1559624_at	STK32A	serine/threonine kinase 32A	3.81	4.91	-2.14	0.0386
1553412_at	AGBL4	ATP/GTP binding protein-like 4	1.99	3.35	-2.57	0.0386
241869_at	APOL6	apolipoprotein L, 6	5.71	3	6.55	0.0388
205325_at	PHYHIP	phytanoyl-CoA 2-hydroxylase interacting protein	4.4	6.09	-3.23	0.0388
223562_at	PARVG	parvin, gamma	0.8	4.05	-9.52	0.0388
203629_s_at	COG5	component of oligomeric golgi complex 5	7.87	8.93	-2.09	0.0389
217103_at	LDLR	low density lipoprotein receptor	0.69	2.97	-4.87	0.0389
241821_at	LINC00908	long intergenic non-protein coding RNA 908	3.62	4.73	-2.16	0.039
216471_x_at	SSX2; SSX2B	synovial sarcoma, X breakpoint 2; synovial sarcoma, X breakpoint 2B	3.02	5.25	-4.69	0.039
1570528_at	XYLT2	xylosyltransferase II	3.06	5.04	-3.94	0.0391
218691_s_at	PDLIM4	PDZ and LIM domain 4	8.71	7.89	1.77	0.0392
1554835_a_at	B3GNT5	UDP-GlcNAc:betaGal beta-1,3-N-acetylglucosaminyltransferase 5	11.23	10.59	1.56	0.0392
220883_at	PRO2012	uncharacterized protein PRO2012	4.93	5.9	-1.96	0.0392
210718_s_at	ARL17A; ARL17B; LOC100294341; LOC100996709	ADP-ribosylation factor like GTPase 17A; ADP-ribosylation factor like GTPase 17B; ADP-ribosylation factor-like protein 17	4.77	6.87	-4.3	0.0393
1557578_at	PHLDB2	pleckstrin homology-like domain, family B, member 2	5.58	4.77	1.76	0.0394
233537_at	KRTAP3-1	keratin associated protein 3-1	2.03	3.99	-3.89	0.0394
223038_s_at	FAM60A	family with sequence similarity 60, member A	12.31	11.66	1.57	0.0395
219412_at	RAB38	RAB38, member RAS oncogene family	7.08	4.78	4.91	0.0396
229989_at	FDXACB1	ferredoxin-fold anticodon binding domain containing 1	2.42	4.88	-5.5	0.0396
217651_at	PELP1	proline, glutamate and leucine rich protein 1	2.46	5.2	-6.69	0.0396
220640_at	CSNK1G1	casein kinase 1, gamma 1	4.49	6.26	-3.4	0.0397
220598_at	CARD14	caspase recruitment domain family, member 14	3.67	2.32	2.55	0.0398
206773_at	LY6H	lymphocyte antigen 6 complex, locus H	3.84	5.58	-3.34	0.0398
231213_at	PDE1A	phosphodiesterase 1A, calmodulin-dependent	0.02	2.89	-7.31	0.04
1560733_at	ALG5	ALG5, dolichyl-phosphate beta-glucosyltransferase	1.85	4.02	-4.48	0.0402
207208_at	RBMXL2	RNA binding motif protein, X-linked-like 2	3.59	1.46	4.39	0.0403
205837_s_at	GYPA	glycophorin A (MNS blood group)	1.3	4.73	-10.82	0.0403
220025_at	TBR1	T-box, brain, 1	4.33	1.11	9.29	0.0404
1563078_at	LOC101929460	uncharacterized LOC101929460	3.96	5.85	-3.71	0.0404
1558177_at	TMEM229B	transmembrane protein 229B	5.02	3.04	3.93	0.0407
207082_at	CSF1	colony stimulating factor 1 (macrophage)	4.65	6.83	-4.5	0.0407
1556920_s_at	LINC01330	long intergenic non-protein coding RNA 1330	0.55	4.3	-13.42	0.0407
1562217_at	LOC646383	uncharacterized LOC646383	3.75	4.88	-2.19	0.041
236064_at	SLC25A35	solute carrier family 25, member 35	4.46	6.59	-4.38	0.041
211849_s_at	RNGTT	RNA guanylyltransferase and 5'-phosphatase	6.76	8.02	-2.39	0.0412
202672_s_at	ATF3	activating transcription factor 3	9.84	10.73	-1.84	0.0413
236172_at	LTB4R	leukotriene B4 receptor	1.22	5.11	-14.91	0.0416
226189_at	ITGB8	integrin beta 8	3.84	5.2	-2.57	0.0419
208430_s_at	DTNA	dystrobrevin, alpha	3.12	5.2	-4.25	0.0419
242530_at	SV2C	synaptic vesicle glycoprotein 2C	2.75	4.43	-3.22	0.042
203666_at	CXCL12	chemokine (C-X-C motif) ligand 12	8.75	7.68	2.11	0.0422
229568_at	MOB3B	MOB kinase activator 3B	1.97	4.17	-4.58	0.0423
218472_s_at	PELO	pelota homolog (Drosophila)	10.45	9.84	1.52	0.0427
1553546_at	PRO2012	uncharacterized protein PRO2012	2.78	4.92	-4.42	0.0428
210506_at	FUT7	fucosyltransferase 7 (alpha (1,3) fucosyltransferase)	4.47	5.68	-2.31	0.0431
232720_at	LINGO2	leucine rich repeat and Ig domain containing 2	3.52	4.71	-2.27	0.0432
205016_at	TGFA	transforming growth factor alpha	8.46	7.64	1.76	0.0433
206778_at	CRYBB2	crystallin beta B2	5.06	5.74	-1.6	0.0433
206873_at	CA6	carbonic anhydrase VI	3.67	4.74	-2.09	0.0435
1570189_at	LINC00671	long intergenic non-protein coding RNA 671	0.29	1.92	-3.09	0.0435
205991_s_at	PRRX1	paired related homeobox 1	5.65	6.62	-1.95	0.0438
1557256_a_at	GABRB1	gamma-aminobutyric acid (GABA) A receptor, beta 1	0.69	2.92	-4.68	0.0438
215491_at	MYCL	v-myc avian myelocytomatosis viral oncogene lung carcinoma derived homolog	4.56	1.45	8.65	0.044
235709_at	GAS2L3	growth arrest-specific 2 like 3	8.05	8.69	-1.55	0.044
204273_at	EDNRB	endothelin receptor type B	7.44	6.27	2.25	0.0443
212675_s_at	CEP68	centrosomal protein 68kDa	9.35	10.35	-1.99	0.0445
241574_s_at	IGF2BP1	insulin-like growth factor 2 mRNA binding protein 1	1.63	4.85	-9.35	0.0446
225252_at	SRXN1	sulfiredoxin 1	10.8	10.03	1.71	0.0447
51774_s_at	UBE2D4	ubiquitin-conjugating enzyme E2D 4 (putative)	6.52	7.2	-1.6	0.0447
1558920_at	SLC8A1-AS1	SLC8A1 antisense RNA 1	1.58	4.57	-7.96	0.0447
213737_x_at	GOLGA8N	golgin A8 family, member N	7.95	8.67	-1.65	0.0448
1570327_at	LINC01620	long intergenic non-protein coding RNA 1620	3.05	1.2	3.6	0.0449
1564309_at	LINC00486	long intergenic non-protein coding RNA 486	1.3	3.66	-5.14	0.0449
37796_at	SAP25	Sin3A associated protein 25kDa	3.37	5.8	-5.4	0.045
229285_at	RNASEL	ribonuclease L (2',5'-oligoisoadenylate synthetase-dependent)	5.28	3.42	3.63	0.0452
212573_at	ENDOD1	endonuclease domain containing 1	10.63	10.02	1.53	0.0457
1569481_s_at	SNX22	sorting nexin 22	2.98	4.99	-4.05	0.0457
200785_s_at	LRP1	LDL receptor related protein 1	2.24	4.5	-4.79	0.0458
1563222_at	TMBIM4	transmembrane BAX inhibitor motif containing 4	7.1	7.91	-1.75	0.046
244769_at	LINC01184; LOC105379165	long intergenic non-protein coding RNA 1184; uncharacterized LOC105379165	2.45	4.18	-3.31	0.046
208591_s_at	PDE3B	phosphodiesterase 3B, cGMP-inhibited	0.55	2.28	-3.31	0.0461
236922_at	NCK1	NCK adaptor protein 1	4.08	5.44	-2.56	0.0462
1569006_at	LOC284379	solute carrier family 7 (cationic amino acid transporter, y+ system), member 3 pseudogene	1.64	2.88	-2.37	0.0464
225017_at	CCDC14	coiled-coil domain containing 14	8.61	7.92	1.62	0.0465
1569225_a_at	SCML4	sex comb on midleg-like 4 (Drosophila)	0.73	3	-4.82	0.0466
237885_at	SOX21-AS1	SOX21 antisense RNA 1 (head to head)	2.45	6.72	-19.35	0.0466
220146_at	TLR7	toll-like receptor 7	0.95	2.76	-3.51	0.0469
237990_x_at	CACTIN	cactin, spliceosome C complex subunit	3.41	5	-3	0.0471
242623_x_at	PSMG4	proteasome (prosome, macropain) assembly chaperone 4	2.99	4.99	-3.99	0.0471
231840_x_at	LYRM7	LYR motif containing 7	3.51	5.02	-2.83	0.0472
211737_x_at	PTN	pleiotrophin	4.46	6.2	-3.34	0.0473
219729_at	PRRX2	paired related homeobox 2	4.87	5.85	-1.98	0.0475
59644_at	BMP2K	BMP2 inducible kinase	9.08	8.46	1.53	0.0476
1556172_at	LOC105374809	uncharacterized LOC105374809	4.51	6.5	-3.95	0.0476
219391_at	BPNT1	3'(2'), 5'-bisphosphate nucleotidase 1	4.73	5.4	-1.59	0.0477
243696_at	CEP104	centrosomal protein 104kDa	4.05	5.18	-2.18	0.0478
1560922_s_at	ZNF169	zinc finger protein 169	5.1	6.1	-2	0.0479
217104_at	ST20	suppressor of tumorigenicity 20	2.81	5.12	-4.94	0.0481
238777_x_at	ATMIN	ATM interactor	6.6	7.3	-1.62	0.0484
208449_s_at	FGF8	fibroblast growth factor 8 (androgen-induced)	2.5	3.58	-2.11	0.0484
227113_at	ADHFE1	alcohol dehydrogenase, iron containing 1	5.81	6.98	-2.26	0.0487
231794_at	CTLA4	cytotoxic T-lymphocyte-associated protein 4	2.86	4.38	-2.87	0.0488
218068_s_at	ZNF672	zinc finger protein 672	10.39	9.66	1.66	0.0489
231852_at	ERI1	exoribonuclease 1	6.67	5.41	2.39	0.0491
222291_at	FAM149A	family with sequence similarity 149, member A	5.08	3.07	4.02	0.0493
218746_at	TAPBPL	TAP binding protein-like	8.04	7.09	1.94	0.0493
230243_at	TRMT10A	tRNA methyltransferase 10A	5.41	6.31	-1.86	0.0495
1553702_at	ZNF697	zinc finger protein 697	7.89	9.57	-3.21	0.0495
1563707_at	LOC105369748	uncharacterized LOC105369748	4.02	6.29	-4.82	0.0495
231230_at	KCNK10	potassium channel, two pore domain subfamily K, member 10	1.59	4.84	-9.51	0.0495

## Sheet: Table S3
Table S3. The top 15 upregulated genes at 4 hours post-RA treatment.
RARE (retinoic acid response element)-containing genes are highlighted in blue.
No	Gene symbol	Gene description	Fold change	P-value
1	DHRS3	dehydrogenase/reductase (SDR family) member 3	9.33	5.43e-10
2	CXCL8	chemokine (C-X-C motif) ligand 8	9.24	2.56e-07
3	RARB	retinoic acid receptor, beta	13.88	1.11e-06
4	NRIP1	nuclear receptor interacting protein 1	4.49	3.74e-06
5	HIC1	hypermethylated in cancer 1	3.34	1.33e-05
6	HOXA3	homeobox A3	5.54	3.2e-05
7	RDH10	retinol dehydrogenase 10 (all-trans)	3.35	6.44e-05
8	BMP2	bone morphogenetic protein 2	5.92	0.0004
9	HOXA5	homeobox A5	4.53	0.0004
10	KIF5C	kinesin family member 5C	7.69	0.0005
11	RGCC	regulator of cell cycle	16.6	0.0006
12	ARHGAP18	Rho GTPase activating protein 18	2.4	0.0009
13	SDPR	serum deprivation response	2.22	0.0009
14	CSNK1A1P1	casein kinase 1, alpha 1 pseudogene 1	15.41	0.0011
15	NET1	neuroepithelial cell transforming 1	2.02	0.0011

## Sheet: Table S4
Table S4. The top 15 upregulated genes at 40 minutes post-RA treatment.
No RARE-containing genes were identified.
No	Gene Symbol	Gene description	Fold change	P-value
1	MAP3K2	mitogen-activated protein kinase kinase kinase 2	8.04	6.31e-07
2	DCAF6	DDB1 and CUL4 associated factor 6	12.66	3.25e-05
3	XPNPEP3	X-prolyl aminopeptidase 3, mitochondrial	38.97	4.5e-05
4	FBXO33	F-box protein 33	5.25	0.0001
5	GUSBP2	glucuronidase, beta pseudogene 2	9.41	0.0001
6	LGI2	leucine-rich repeat LGI family, member 2	3.19	0.0002
7	SCGN	secretagogin, EF-hand calcium binding protein	6.32	0.0004
8	AMZ1	archaelysin family metallopeptidase 1	20.28	0.0004
9	RPL15	ribosomal protein L15	7.14	0.0007
10	COL12A1	collagen, type XII, alpha 1	15.26	0.0008
11	ADAMTSL2	ADAMTS like 2	2.85	0.0009
12	NAA30	N(alpha)-acetyltransferase 30, NatC catalytic subunit	3.97	0.0011
13	TSHZ2	teashirt zinc finger homeobox 2	4.56	0.0012
14	PWAR6	Prader Willi/Angelman region RNA 6	5.76	0.0012
15	DCN	decorin	4.92	0.0018

## Sheet: Table S5
Table S5. Evaluation of extracellular TGFα levels in the culture supernatants of HPMECs treated with EtOH control and RA.
ELISA assay was performed using a Human TGF-alpha DuoSet ELISA kit
TGFα standard curve	Mean absorbance at 450 nm subtract 570 nm
(pg/ml)	(Mean of triplicates)
0	0.009
7.81	0.0383333
15.6	0.069
31.3	0.113667
62.5	0.190667
125	0.334333
250	0.464333
500	0.682333
HPMEC culture supernatant	Mean absorbance at 450 nm subtract 570 nm
	(Mean of 4 technical replicates)
4 h after EtOH control treatment	< 0.02 (lower than detection threshold)
4 h after RA treatment	< 0.02 (lower than detection threshold)
16 h after EtOH control treatment	< 0.02 (lower than detection threshold)
16 h after RA treatment	< 0.02 (lower than detection threshold)
Recombinant human TGFα	Mean absorbance at 450 nm subtract 570 nm
in culture medium for 6 h	(Mean of triplicates)
40 ng/ml recombinant TGFα	< 0.02 (lower than detection threshold)
4 ng/ml recombinant TGFα	< 0.02 (lower than detection threshold)
7 pg/ml recombinant TGFα	< 0.02 (lower than detection threshold)

## Sheet: Table S6
Table S6. Detailed sample information for microarray profiling.
Sample	File name	Experimental replicate	Condition	Time point
1	Sample_1_24818_E1	Replicate 1	EtOH	0 h
2	Sample_2_24818_E2	Replicate 1	EtOH	40 min
3	Sample_3_24818_E3	Replicate 1	EtOH	4 h
4	Sample_4_24818_R1	Replicate 1	RA-treated	0 h
5	Sample_5_24818_R2	Replicate 1	RA-treated	40 min
6	Sample_6_24818_R3	Replicate 1	RA-treated	4 h
7	Sample_7_30818_E1	Replicate 2	EtOH	0 h
8	Sample_8_30818_E2	Replicate 2	EtOH	40 min
9	Sample_9_30818_E3	Replicate 2	EtOH	4 h
10	Sample_10_30818_R1	Replicate 2	RA-treated	0 h
11	Sample_11_30818_R2	Replicate 2	RA-treated	40 min
12	Sample_12_30818_R3	Replicate 2	RA-treated	4 h
13	Sample_13_30818_E1	Replicate 3	EtOH	0 h
14	Sample_14_30818_E2	Replicate 3	EtOH	40 min
15	Sample_15_30818_E3	Replicate 3	EtOH	4 h
16	Sample_16_30818_R1	Replicate 3	RA-treated	0 h
17	Sample_17_30818_R2	Replicate 3	RA-treated	40 min
18	Sample_18_30818_R3	Replicate 3	RA-treated	4 h
19	Sample_19_040918_E1	Replicate 4	EtOH	0 h
20	Sample_20_040918_E2	Replicate 4	EtOH	40 min
21	Sample_21_040918_E3	Replicate 4	EtOH	4 h
22	Sample_22_040918_R1	Replicate 4	RA-treated	0 h
23	Sample_23_040918_R2	Replicate 4	RA-treated	40 min
24	Sample_24_040918_R3	Replicate 4	RA-treated	4 h
