# Supplementary material for: TGF-alpha/EGFR signalling mediates retinoic acid-induced lung repair
Source: Research Square preprint supplement (doi:10.21203/rs.3.rs-7704784/v1), 2025-11-24
Supplement: Supplementary file 1 [file dd7641fa0594524cb4232187.pdf]

**Video S1. Time-lapse video of HPMECs treated with 10  $\mu$ M of RA undergoing angiogenesis.**

Imaging was performed in a pre-equilibrated, humidified incubator chamber maintained at 37°C with 5% CO<sub>2</sub> and approximately 21% oxygen. Images were captured every 20 minutes over a period of 4 hours using an inverted Zeiss Axio Observer widefield epifluorescence microscope with an EC Plan-Neofluar 10×/0.30 objective lens.

**Video S2. Time-lapse video of HPMECs treated with ethanol vehicle control.**

Imaging conditions were identical to those in Video S1, with images taken every 20 minutes for 4 hours in a pre-equilibrated, humidified incubator chamber maintained at 37°C with 5% CO<sub>2</sub> and approximately 21% oxygen, using the same microscope and objective lens.

**Tables S1-S6** are provided as a separate Microsoft Excel file.

**Table S1. List of DEGs at 40 minutes post-treatment comparing EtOH control and RA-treated HPMECs.**

**Table S2. List of DEGs at 4 hours post-treatment comparing EtOH control and RA-treated HPMECs.**

**Table S3. The top 15 upregulated genes at 4 hours post-RA treatment.** RARE (retinoic acid response element)-containing genes are highlighted in blue.

**Table S4. The top 15 upregulated genes at 40 minutes post-RA treatment.** No RARE-containing genes were identified.

**Table S5. Evaluation of extracellular TGF $\alpha$  levels in the culture supernatants of HPMECs treated with EtOH control and RA.** ELISA assay was performed using a Human TGF-alpha DuoSet ELISA kit.

**Table S6. Detailed sample information for microarray profiling.**

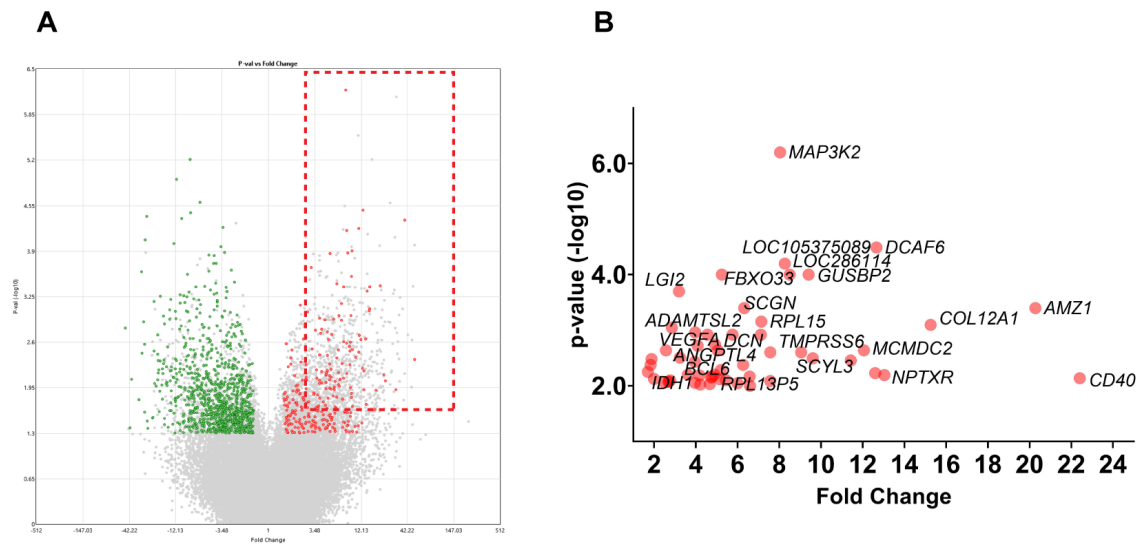

**Figure S1. Differentially expressed genes (DEGs) in EtOH control versus RA-treated HPMECs at 40 minutes post-treatment. (A)** Volcano plot showing DEGs between EtOH control and RA-treated HPMECs at 40 minutes post-treatment. Upregulated genes are shown in red; downregulated genes are shown in green. **(B)** Extrapolated volcano plot highlighting the top upregulated genes after 40 minutes of RA treatment.

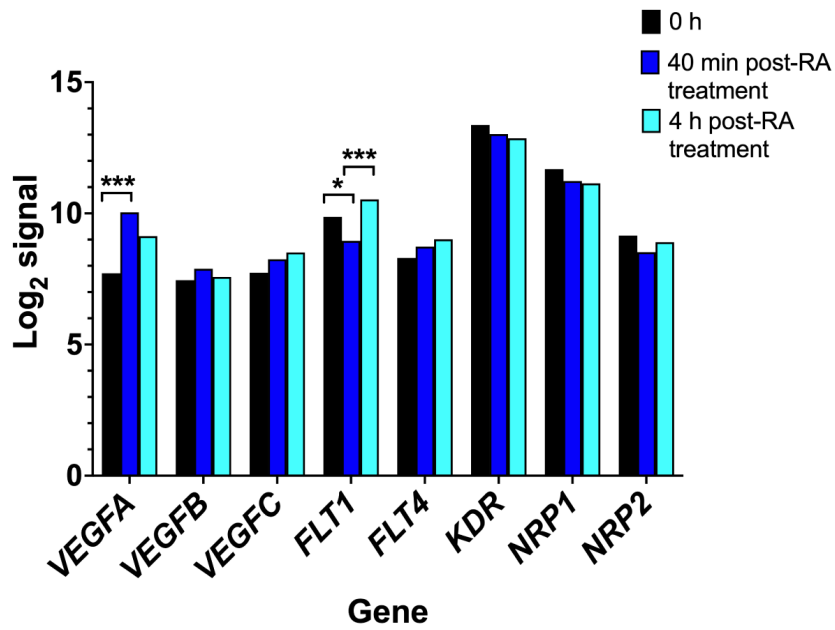

**Figure S2. Upregulation of *VEGFA* and *FLT1* in HPMECs following RA treatment.** Histogram showing expression levels of key genes in VEGF signalling, including *VEGFA*, *VEGFB*, *VEGFC*, *FLT1* (*VEGFR1*), *FLT4* (*VEGFR3*), *KDR* (*VEGFR2*), *NRP1*, and *NRP2*.

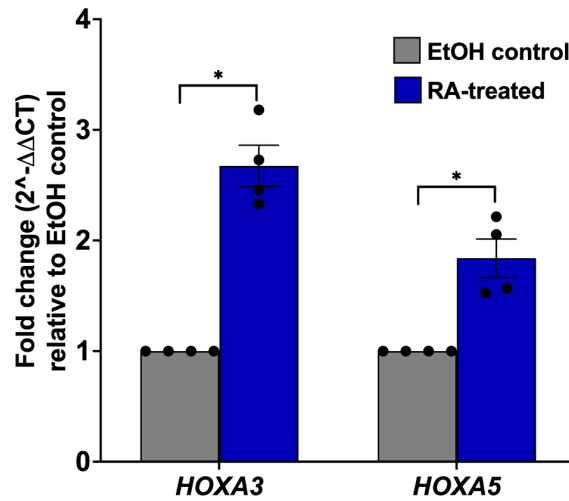

**Figure S3. Upregulation of *HOXA3* and *HOXA5* in RA-treated HPMECs.** Histogram showing increased transcript levels of *HOXA3* and *HOXA5* at 4 hours post-RA treatment, assessed by qRT-PCR. HPMEC monolayers were cultured on fibronectin-coated plates. *HOXA3* and *HOXA5* were among the top upregulated genes identified in the microarray analysis.  $n = 4$  independent experiments; each experiment was run in triplicate. Each dot represents the mean value per experiment. Data are presented as mean  $\pm$  SEM; Mann–Whitney  $U$ -test,  $*p < 0.05$ .

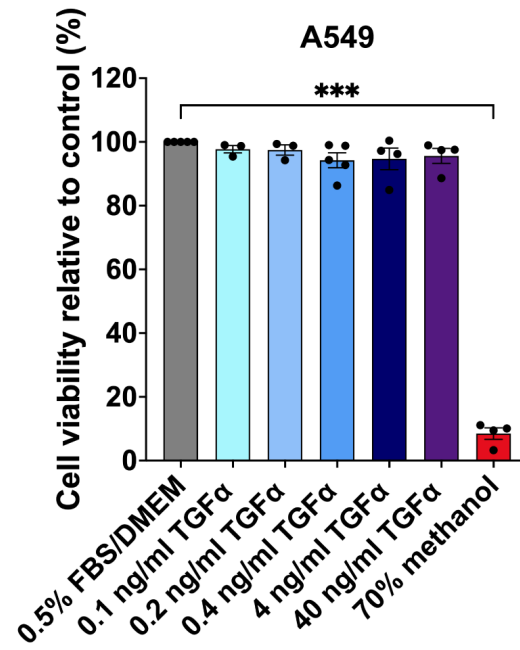

**Figure S4. MTT metabolic assay results in A549 cells.** Histogram showing cell viability in A549 cells treated with varying concentrations of TGFα. DMEM with 0.5% FBS served as a negative control, and 70% methanol-treated cells served as a positive control for cell death. Data are presented as mean  $\pm$  SEM; Kruskal-Wallis with Dunn's multiple comparisons test, \*\*\* $p < 0.001$ .

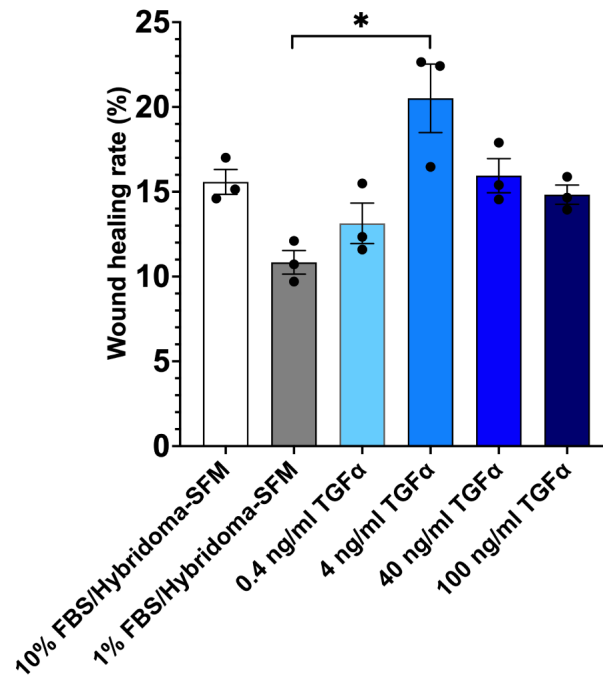

**Figure S5. TGFα promotes wound healing in hAT2 cells in a dose-dependent manner.** Histogram showing the percentage of wound healed at 24 hours post-scratch in hAT2 cells treated with hybridoma medium containing 10% FBS (positive control), hybridoma medium with 1% FBS (negative control), or varying concentrations of recombinant TGFα (0.4 ng/ml, 4 ng/ml, 40 ng/ml, and 200 ng/ml).  $n$  = hAT2 cells from 1 donor; three technical replicates per experiment; each dot represents a technical replicate. Data are presented as mean  $\pm$  SEM; Kruskal-Wallis with Dunn's multiple comparisons test,  $*p < 0.05$ .

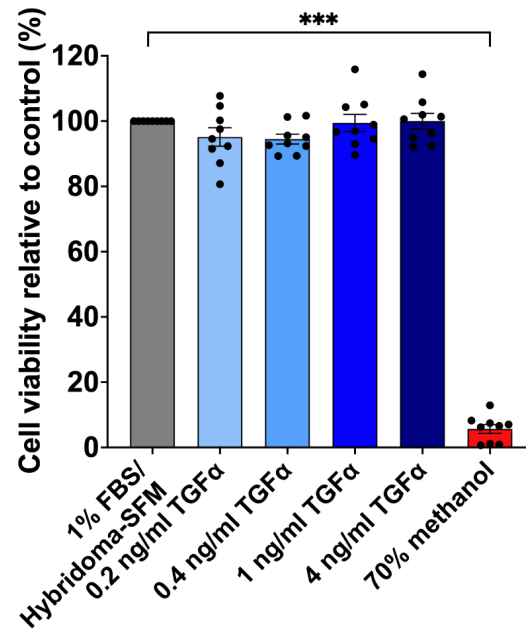

**Figure S6. MTT cell viability assay in hAT2 cells.** Histogram showing cell viability in hAT2 cells treated with different concentrations of TGFα (0.2 ng/ml, 0.4 ng/ml, 1 ng/ml, and 4 ng/ml). Hybridoma medium with 1% FBS served as a negative control, and 70% methanol-treated cells served as a positive control for cell death.  $n$  = hAT2 cells from 3 donors; three technical replicates per experiment; each dot represents a technical replicate. Data are presented as mean  $\pm$  SEM; Kruskal-Wallis with Dunn's multiple comparisons test, \*\*\* $p$  < 0.001.

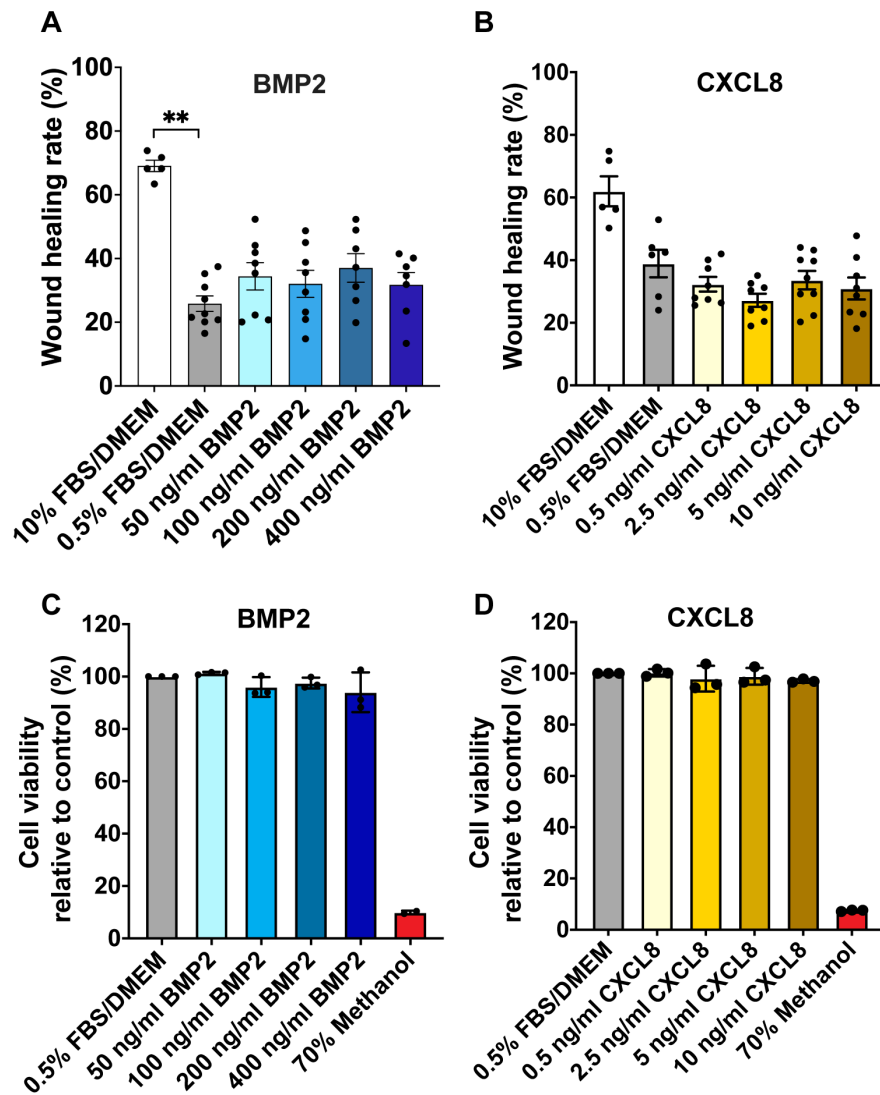

**Figure S7. BMP2 and CXCL8 do not affect wound healing in A549 cells.** (A-B) Percentage of wound healed at 24 hours in A549 cells treated with DMEM/10% FBS (positive control), DMEM/1% FBS (negative control), or varying concentrations of BMP2 (50 ng/ml, 100 ng/ml, 200 ng/ml, and 400 ng/ml BMP2) (A), and CXCL8 (0.5 ng/ml, 2.5 ng/ml, 5 ng/ml, 10 ng/ml CXCL8) (B). (C-D) Histograms showing cell viability in A549 cells treated with different concentrations of BMP2 and CXCL8. DMEM with 0.5% FBS served as a negative control, and 70% methanol-treated cells served as a positive control for cell death.  $n =$  three independent experiments; two or three technical replicates per experiment; each dot represents the mean value per experiment. Data are presented as mean  $\pm$  SEM; Kruskal-Wallis with Dunn's multiple comparisons test,  $*p < 0.01$ .



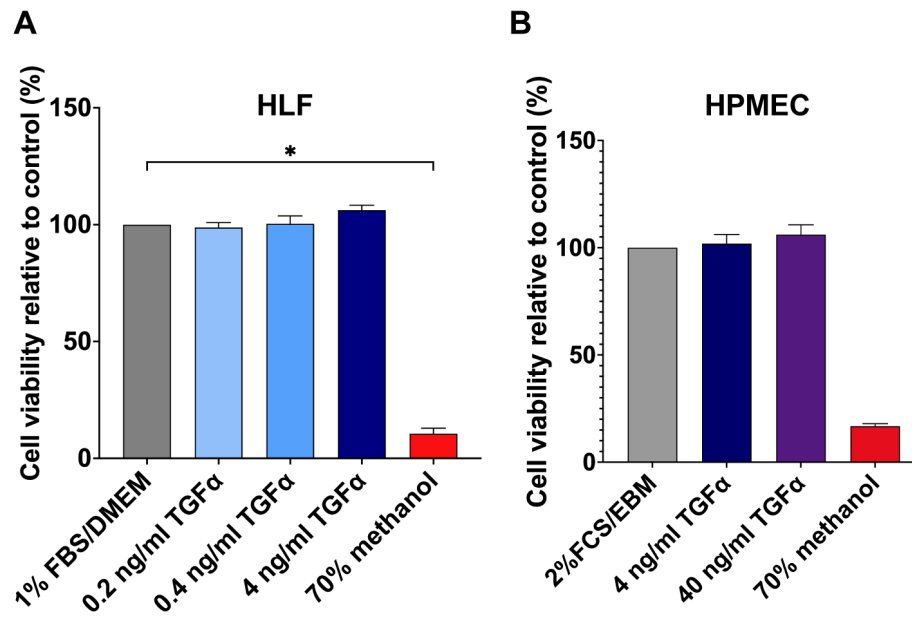

**Figure S8. Assessment of cell viability in HLFs and HPMECs using MTT metabolic assays. (A-B)**

Cell viability in HLFs treated with TGFα at 0.2 ng/ml, 0.4 ng/ml, and 4 ng/ml **(A)** and HPMECs (4 ng/ml and 40 ng/ml) **(B)**. DMEM with 1% FBS and EBM with 2% FCS served as negative controls for HLFs and HPMECs, respectively, while 70% methanol-treated cells served as a positive control for cell death. For HLFs:  $n$  = HLFs from 3 donors; three technical replicates per experiment. For HPMECs:  $n$  = 1 experiment run in triplicate. Data are presented as mean  $\pm$  SEM; Kruskal-Wallis with Dunn's multiple comparisons test was performed for HLFs, \*\*\* $p$  < 0.001.

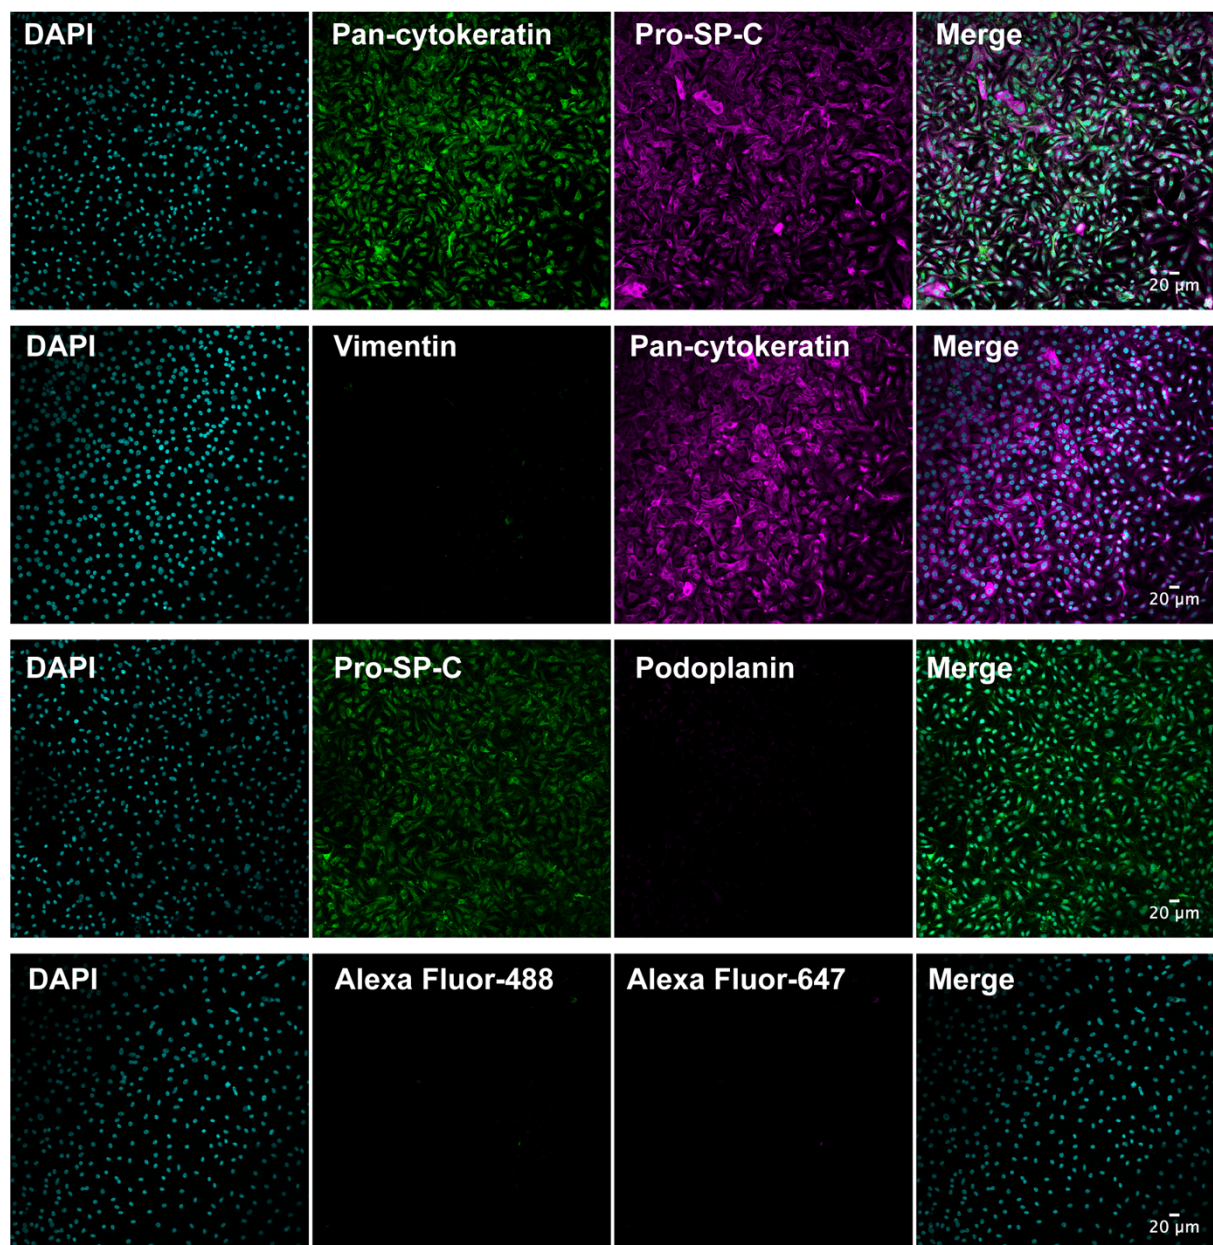

**Figure S9. Immunostaining of hAT2 cells to confirm cell specificity.** Representative images of hAT2 cells immunostained for pan-cytokeratin (a pan-epithelial marker), Pro-SPC (an AT2 cell marker), vimentin (a fibroblast marker), and podoplanin (PDPN; an AT1 cell marker) at 68 hours post-seeding. Negative controls lacking primary antibody are shown in the bottom panels. Nuclei were counterstained with DAPI (cyan). Images were captured using a Leica SP8 inverted confocal microscope with a HC PL APO 10×/0.40 air objective lens.
